# Supplementary material for: Natural history of tinnitus in adults: a cross-sectional and longitudinal analysis
Source: PubMed Central journal article supplement — BMJ Open. 2020 Dec 10;10(12):e041290. doi: 10.1136/bmjopen-2020-041290 (PMC7733183; doi:10.1136/bmjopen-2020-041290), 2020-12-10
Supplement: bmjopen-2020-041290.draft_revisions.pdf [file bmjopen-2020-041290.draft_revisions.pdf]

# BMJ Open

BMJ Open is committed to open peer review. As part of this commitment we make the peer review history of every article we publish publicly available.

When an article is published we post the peer reviewers' comments and the authors' responses online. We also post the versions of the paper that were used during peer review. These are the versions that the peer review comments apply to.

The versions of the paper that follow are the versions that were submitted during the peer review process. They are not the versions of record or the final published versions. They should not be cited or distributed as the published version of this manuscript.

BMJ Open is an open access journal and the full, final, typeset and author-corrected version of record of the manuscript is available on our site with no access controls, subscription charges or pay-per-view fees (<http://bmjopen.bmj.com>).

If you have any questions on BMJ Open's open peer review process please email [info.bmjopen@bmj.com](mailto:info.bmjopen@bmj.com)

# BMJ Open

## The natural history of tinnitus in adults: a cross sectional and longitudinal analysis

|                               |                                                                                                                                                                                                                                                                                                                                                                                                                                                 |
|-------------------------------|-------------------------------------------------------------------------------------------------------------------------------------------------------------------------------------------------------------------------------------------------------------------------------------------------------------------------------------------------------------------------------------------------------------------------------------------------|
| Journal:                      | <i>BMJ Open</i>                                                                                                                                                                                                                                                                                                                                                                                                                                 |
| Manuscript ID                 | bmjopen-2020-041290                                                                                                                                                                                                                                                                                                                                                                                                                             |
| Article Type:                 | Original research                                                                                                                                                                                                                                                                                                                                                                                                                               |
| Date Submitted by the Author: | 04-Jun-2020                                                                                                                                                                                                                                                                                                                                                                                                                                     |
| Complete List of Authors:     | Dawes, Piers; University of Manchester, Oxford Road, M13 9PL, Manchester, UK, NIHR Manchester Biomedical Research Centre; Macquarie University, Department of Linguistics<br>Newall, John; Macquarie University, Linguistics<br>Stockdale, David ; British Tinnitus Association, Baguley, David; University of Nottingham, NIHR Nottingham Biomedical Research Centre; Nottingham University Hospitals NHS Trust, Nottingham Audiology Services |
| Keywords:                     | EPIDEMIOLOGY, Adult otolaryngology < OTOLARYNGOLOGY, Audiology < OTOLARYNGOLOGY                                                                                                                                                                                                                                                                                                                                                                 |
|                               |                                                                                                                                                                                                                                                                                                                                                                                                                                                 |

SCHOLARONE™  
Manuscripts

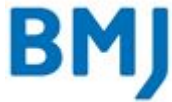

I, the Submitting Author has the right to grant and does grant on behalf of all authors of the Work (as defined in the below author licence), an exclusive licence and/or a non-exclusive licence for contributions from authors who are: i) UK Crown employees; ii) where BMJ has agreed a CC-BY licence shall apply, and/or iii) in accordance with the terms applicable for US Federal Government officers or employees acting as part of their official duties; on a worldwide, perpetual, irrevocable, royalty-free basis to BMJ Publishing Group Ltd ("BMJ") its licensees and where the relevant Journal is co-owned by BMJ to the co-owners of the Journal, to publish the Work in this journal and any other BMJ products and to exploit all rights, as set out in our [licence](#).

The Submitting Author accepts and understands that any supply made under these terms is made by BMJ to the Submitting Author unless you are acting as an employee on behalf of your employer or a postgraduate student of an affiliated institution which is paying any applicable article publishing charge ("APC") for Open Access articles. Where the Submitting Author wishes to make the Work available on an Open Access basis (and intends to pay the relevant APC), the terms of reuse of such Open Access shall be governed by a Creative Commons licence – details of these licences and which [Creative Commons](#) licence will apply to this Work are set out in our licence referred to above.

Other than as permitted in any relevant BMJ Author's Self Archiving Policies, I confirm this Work has not been accepted for publication elsewhere, is not being considered for publication elsewhere and does not duplicate material already published. I confirm all authors consent to publication of this Work and authorise the granting of this licence.

## The natural history of tinnitus in adults: a cross sectional and longitudinal analysis

**Piers Dawes<sup>1,2</sup>**

**John Newall<sup>2</sup>**

**David Stockdale<sup>3</sup>**

**David M. Baguley<sup>4,5,6</sup>**

1. NIHR Manchester Biomedical Research Centre, University of Manchester, Manchester, UK
2. The Department of Linguistics, Macquarie University, Sydney, Australia
3. British Tinnitus Association, Sheffield UK
4. NIHR Nottingham Biomedical Research Centre, University of Nottingham, Nottingham, UK
5. Hearing Sciences, Division of Clinical Neurosciences, School of Medicine, University of Nottingham, Nottingham UK
6. Nottingham Audiology Services, Nottingham University NHS Trust, Nottingham UK

Word count: 4126

Address for correspondence:

Dr P Dawes, The Department of Linguistics, Macquarie University, Sydney, Australia  
piers.dawes@manchester.ac.uk

## Abstract

### Objective

To assess incidence and changes in tinnitus and bothersome tinnitus as well as associated risk factors in a large sample of UK adults.

### Design

Prospective cohort study

### Setting

United Kingdom

### Participants

For cross-sectional analysis, a group of 168,348 participants aged between 40 to 69 years with hearing and tinnitus data, from the UK Biobank resource. Longitudinal analysis included a subset of 4,746 people who attended a 4 year retest assessment.

### Main outcome measures

Presence and bothersomeness of tinnitus.

### Results

17.7% and 5.8% of participants reported tinnitus or bothersome tinnitus respectively. The 4 year incidence of tinnitus was 8.7%. Multivariate logistic regression models suggested that age, hearing difficulties, work noise exposure, ototoxic medication, and neuroticism were all positively associated with both tinnitus and bothersome tinnitus. Reduced odds of tinnitus, but not bothersome tinnitus was seen in alcohol drinkers versus non-drinkers. Male gender was associated with increased odds of tinnitus, whilst female gender was associated with increased odds of bothersome tinnitus. At follow up, of those originally reporting tinnitus, 18.3% reported no tinnitus. Of those still reporting tinnitus, 9% reported improvement, 9% reported tinnitus becoming more bothersome, with the rest unchanged. Male gender and alcohol consumption were associated with tinnitus being reported less bothersome, hearing difficulties were associated with the odds of tinnitus being reported as more bothersome.

## Conclusions

This study is one of the few to provide data on the natural history of tinnitus in a non-clinical population, suggesting that resolution is relatively uncommon, with improvement and worsening of symptoms equally likely. There was limited evidence for any modifiable lifestyle factors being associated with changes in tinnitus symptoms. In view of the largely persistent nature of tinnitus, public health strategies should focus on i) primary prevention and ii) managing symptoms in people that have tinnitus, and monitoring changes in bothersomeness.

## Keywords

Tinnitus, Biobank, natural history, incidence

## Article Summary

### Strengths and limitations of this study

- This study investigated both the prevalence and incidence of tinnitus and its correlates in a sample drawn from the UK Biobank resource.
- The study includes both a cross sectional analysis of a large sample (168,348 participants), with the longitudinal component based on a smaller sample (4,746 participants).
- The UK Biobank resource, from which the data was drawn, is not completely representative of the UK population.
- A wide range of relevant risk factors were available for the analysis.
- Lack of a consensus on the definition of tinnitus hampers comparison across the literature.

## Introduction

Tinnitus (the subjective experience of sound perception when there is no external source) can be a troublesome experience, and when severe can be associated with insomnia, poor concentration, anxiety, and/or depression.(1) Around 10-15% of adults have tinnitus, and although cost effective, the cost of care of patients with tinnitus is high.(2) The question of the natural history of tinnitus in adults is of major importance for both patients and clinicians (3) but data regarding the natural history of tinnitus in adults are scant. A few studies have investigated tinnitus in various populations longitudinally (Table 1). Estimates of the incidence of tinnitus vary depending on the age of the population and the definition of tinnitus in each study. Such studies are useful in demand forecasting for diagnostic and therapy services, but do not support the counselling of existing tinnitus cases regarding their prognosis. The main limitation of many studies examining changes in tinnitus over time is that they were conducted with specific populations, clinical samples, or with people taking part in tinnitus research, and so may not be representative of the general population.

Clifford et al. (4) reported on the progression of tinnitus in a US Marine cohort, indicating that worsening tinnitus was associated with the presence of Post-Traumatic Stress Disorder, and moderate/severe Traumatic Brain Injury (TBI). One other study reported a modest improvement in the bothersomeness of tinnitus at follow up 4.9 years after treatment by a Clinical Psychologist, the majority (59%) having received cognitive behaviour therapy for tinnitus.(3) Another study reported that severity of symptoms tended to be more severe, with tinnitus of longer duration among patients presenting for tinnitus therapy.(5) A systematic review and meta-analysis reporting the experiences of patients with tinnitus who were research participants enrolled in control (waiting list) arms of clinical trials reported a small, statistically significant improvement in tinnitus symptoms over time, though clinical significance of these improvements was unclear.(6) Placebo groups in controlled clinical trials of tinnitus treatments have also reported reduced bothersomeness of tinnitus immediately and up to 14 weeks post placebo treatment.(7-9) In a conference report Smith and Coles(10) reported data regarding tinnitus from the UK National Study of Hearing.(11) Participants reporting tinnitus experiences were asked to retrospectively rate their tinnitus loudness and annoyance at two stages of their tinnitus experience: 'onset to middle' and 'middle/recent or end'. These ill-defined sample points render the data in this report are

hard to interpret, but it appears that in a small number (8.5%) the tinnitus had resolved completely, and that there was a general trend over time towards decreased annoyance.

Large scale data regarding longitudinal experiences of a general population regarding tinnitus has not been reported to date, with the closest examples examining samples an order of magnitude smaller than the present study.(12, 13) The only large scale population data available examined only incidence and utilised indirect measures of tinnitus based on clinical record or health claim data. (14, 15) In the present study the aim was to establish the proportions of people who experience tinnitus and bothersome tinnitus, and changes in tinnitus and bothersome tinnitus over time and to determine demographic, health and lifestyle correlates, in order to inform patient counselling and identify potential avenues for prevention and treatment of tinnitus.

**Table 1. Prevalence and incidence rates of tinnitus**

| Study                      | Definition of tinnitus                                                                                                                 | Population                                                                                               | Tinnitus Baseline              | Follow-up interval                                                                            |
|----------------------------|----------------------------------------------------------------------------------------------------------------------------------------|----------------------------------------------------------------------------------------------------------|--------------------------------|-----------------------------------------------------------------------------------------------|
| Gopinath, McMahon (13)     | Tinnitus over the past year lasting 5 minutes or longer                                                                                | Australia<br>Age: $\geq 55$ years<br>Baseline (n=2006)<br>Follow-up (n=1292, female=58.9%)               | 37% (481)*                     | <b>5 year follow-up</b><br>Persisting: 82% (346)<br>Resolved: 18% (78)<br>Incident: 18% (156) |
| Nondahl, Cruickshanks (12) | Tinnitus over the past year of i) at least moderate severity or causing difficulty with sleep<br>ii) mild tinnitus not affecting sleep | United States<br>Age: 48-92 years<br>Baseline (n=3753, female=57.7%)<br>Follow-up (n=2800, female=58.6%) | 8.2% (moderate tinnitus) (308) | <b>5 year follow-up</b><br>Incidence of significant tinnitus: 5.7% (143)                      |
|                            |                                                                                                                                        |                                                                                                          | 20.2% (mild tinnitus) (754)    | <b>5 year follow-up</b><br>Persisting : 68.6% (394)<br>Resolved : 31.4% (180)                 |
| Nondahl, Cruickshanks (16) | Tinnitus over the past year of at least moderate severity or causing difficulty with sleep                                             | United States<br>Age: 48-92 years<br>Follow-up (n=2922, female:59.3%)                                    | Baseline<br>N.A.               | <b>10 year follow-up</b><br>12.7% (371)                                                       |
| Lee, Do Han (14)           | Based on record of health service utilisation for 'tinnitus' through the                                                               | South Korea<br>Age: all ages<br>Follow-up (n=51)                                                         | N.A.                           | <b>Yearly incidence</b><br>8.26-9.49 per 1000 from 2006-                                      |



|                                  |                                                                                                                                                                                                                                                                |                                                                               |      |                                                                                                                                                                    |
|----------------------------------|----------------------------------------------------------------------------------------------------------------------------------------------------------------------------------------------------------------------------------------------------------------|-------------------------------------------------------------------------------|------|--------------------------------------------------------------------------------------------------------------------------------------------------------------------|
|                                  | Korean National Health Insurance Service                                                                                                                                                                                                                       | million, female= not reported)                                                |      | 2015<br>9.1% 10 year<br>incidence                                                                                                                                  |
| Martinez,<br>Wallenhorst<br>(15) | Any tinnitus: based on health service utilisation for 'tinnitus' gathered through the United Kingdom Clinical Practice Research Datalink<br>Significant tinnitus: as above but with related follow up within 28 days.<br>See Martinez for full definition (15) | United Kingdom<br>Age: <=85 years<br>Follow-up (n=4.7 million, female= 50.5%) | N.A. | <b>10 year follow-up</b><br>Incidence<br>significant<br>tinnitus 5.4 per<br>10,000 person<br>years<br>Incidence any<br>tinnitus 47.3 per<br>10,000 person<br>years |

## Methods

### Participants

Participants were drawn from the UK Biobank, an international resource for studying the genetic, environmental and lifestyle causes of diseases of middle and older age.(17)

Participant recruitment was conducted via the UK National Health Service and aimed to be as inclusive as possible of the UK population. In total, 9.2 million invitations were sent to recruit 503,325 participants who were aged between 40 to 69 years between 2006 to 2010, a response rate of 5.47%. The UK Biobank sample contains a higher proportion of females, people reporting White British ethnic background and people living in less deprived areas than the general population.(18) The UK Biobank sample is not representative of the UK general population, but the disease-exposure relationships are thought to generalizable due to the size and inclusiveness of the sample. Hearing and tinnitus measures were included part way through data collection, so information on tinnitus at baseline was available for 168,348 participants.

Participants attended an assessment centre where data on demographic, health, environmental and lifestyle factors were collected via computerised questionnaire along with physical measures including hearing testing during assessments of around 90 minutes in duration. Further information on procedures and the data collected is contained on the UK Biobank website (<http://www.ukbiobank.ac.uk/>). During 2012 and 2013, 17,819 participants attended a retest assessment, with a 21% response rate. All baseline measures

1  
2  
3 were repeated, including hearing and tinnitus. The mean retest interval was 4.3 years (range  
4 2 to 7 years); retest tinnitus data were available for 4,746 participants. (For further details of  
5 the repeat assessment, see  
6

7  
8 [http://biobank.ctsu.ox.ac.uk/~bbdatan/Repeat\\_assessment\\_doc\\_v1.0.pdf](http://biobank.ctsu.ox.ac.uk/~bbdatan/Repeat_assessment_doc_v1.0.pdf)). UK Biobank  
9 received ethical approval from the North West-Haydock National Research Ethics  
10 Committee (Ref 11/NW/0382), and all participants provided written informed consent.  
11  
12

13  
14  
15  
16 Information on sex and ethnicity (based on 2001 UK Census categories) and area of  
17 residence was collected. Area of residence was used to determine a Townsend deprivation  
18 score. The Townsend deprivation score is a proxy for socioeconomic status, and is applicable  
19 across the countries of the UK.(19) Townsend scores are based on four variables;  
20 unemployment, non-car ownership, non-home ownership and household overcrowding.  
21 Each variable is normalised relative to national levels and summed to provide an overall  
22 deprivation index. Higher scores represent more deprived (less affluent) socioeconomic  
23 status. In the regression analyses below, Townsend scores were grouped from least to most  
24 deprived quartiles in the study sample.  
25  
26  
27  
28  
29  
30  
31  
32

### 33 *Tinnitus*

34  
35  
36 Participants were asked "Do you get or have you had noises (such as ringing or buzzing) in  
37 your head, or in one or both ears, that lasts for more than five minutes at a time?". In this  
38 analysis, tinnitus was identified based on responses of 'yes most of the time', 'yes a lot of  
39 the time' or 'yes some of the time', similar to criteria used in other studies of the  
40 epidemiology of tinnitus (20-22). If a participant reported that they did experience tinnitus  
41 that lasted for more than five minutes at a time, they were asked "How much do these  
42 noises worry, annoy or upset you when they are at their worst?"; severely, moderately,  
43 slightly or not at all. In this analysis, 'bothersome' tinnitus was identified on the basis of  
44 responses of either 'moderately' or 'severely'.  
45  
46  
47  
48  
49  
50  
51  
52

53  
54 Incident tinnitus was identified if a person who did not report tinnitus at baseline reported  
55 tinnitus at least some of the time at retest. Among those who reported tinnitus at baseline,  
56 'Worse tinnitus' was identified if someone reported their tinnitus as not being bothersome  
57  
58  
59  
60

1  
2  
3 at baseline (i.e. 'slightly' or 'not at all') but reported their tinnitus being bothersome at  
4 follow up (i.e. 'moderately' or 'severely').  
5  
6  
7

### 8 *Hearing*

9  
10 Participants completed an English version of the Digit Triplet Test (DTT), as test of speech  
11 recognition in noise developed for large scale hearing screening.(23, 24) The DTT correlates  
12 strongly with audiometric thresholds. The DDT is described elsewhere  
13 (<http://biobank.ctsu.ox.ac.uk/crystal/label.cgi?id=100049>). In short, fifteen sets of three  
14 monosyllabic digits (e.g. 6-1-3) were presented over circumaural headphones with the  
15 volume of presentation set to a comfortable level. Digits were presented in background  
16 noise shaped to match the spectrum of the spoken digits. Noise levels varied adaptively to  
17 track a SNR for the 50% recognition threshold, which was based on the mean SNR for the  
18 last eight triplets. Lower (more negative scores) indicate better performance. Hearing was  
19 additionally indexed by self-reported hearing status with the question "Do you have any  
20 difficulty with your hearing?".  
21  
22  
23  
24  
25  
26  
27  
28  
29  
30  
31

32 *Occupation- and music-related noise exposure, ototoxic medication, metabolic syndrome,*  
33 *physical activity, smoking, alcohol consumption and hearing aid use*

34 The potential associations between tinnitus and risk factors were explored using a  
35 previously identified list and discussion between the authors.(1) Occupational and music-  
36 related noise exposure was assessed by the questions "Have you ever worked in a noisy  
37 place where you had to shout to be heard?" and "Have you ever listened to music for more  
38 than 3 hours per week at a volume which you would need to shout to be heard or, if wearing  
39 headphones, someone else would need to shout for you to hear them?"; with the response  
40 options (i) Yes, for more than 5 years (ii) Yes, for around 1 to 5 years (iii) Yes, for less than 1  
41 year, (iv) No, (v) Do not know, or (vi) Prefer not to answer. The criterion for work- and  
42 music-related noise corresponds to exposure exceeding 85 dB(A) (25). Use of ototoxic  
43 medication was identified on the basis of reported regular (daily, weekly or monthly) use of  
44 medications known to have ototoxic properties (including loop diuretics, aminoglycoside  
45 antibiotics, quinine derivatives, non-steroidal anti-inflammatories and salicylates).  
46  
47 Metabolic syndrome was identified based on the Adult Treatment Panel III report of the  
48 National Cholesterol Education Program (ATP III NCEP) criteria;(26) positive risk was  
49  
50  
51  
52  
53  
54  
55  
56  
57  
58  
59  
60

1  
2  
3 identified on the basis of three or more of waist circumference of  $\geq 102$  cm in men and  $\geq 88$   
4 cm in women; participant report of high cholesterol or if the participant reported they were  
5 currently taking medication for high cholesterol; measured systolic blood pressure greater  
6 than 130 mm Hg or diastolic pressure greater than 85 mm Hg; participant report of diabetes  
7 or the use of medication for diabetes. Participants were identified as being physically  
8 'active' if they reported doing more than 10 minutes of physical activity in relation to the  
9 question "Yesterday, about how long did you spend doing activities that needed moderate  
10 effort, making you somewhat short of breath? For example walking upstairs, going to the  
11 gym, jogging, energetic dancing, aerobics, most sports, using heavy power tools and other  
12 physically demanding DIY & gardening." 'Inactive' participant were identified on the basis of  
13 physical activity of 10 minutes or less. Current or previous tobacco smoking was identified  
14 on the basis of positive responses to two questions; "Do you smoke tobacco now?" and "In  
15 the past, how often have you smoked tobacco?" Alcohol drinkers were identified on the  
16 basis of any report of current alcohol consumption ("About how often do you drink  
17 alcohol?"; 'Special occasions only', 'One to three times a month', 'One or twice a week',  
18 'Three or four times a week' or 'Daily or almost daily'). Non-drinkers were categorised based  
19 on a response of 'Never'. Hearing aid use was identified on the basis of a 'yes' response to  
20 "Do you use a hearing aid most of the time?".

### 21 22 23 24 25 26 27 28 29 30 31 32 33 34 35 36 37 38 *Neuroticism*

39 Neuroticism scores were based on summed positive responses to 12 items from the  
40 Eysenck Personality Inventory (EPI),(27) including Does your mood often go up and down?;  
41 Do you ever feel 'just miserable' for no reason?; Are you an irritable person?; Are your  
42 feelings easily hurt?; Do you often feel 'fed-up'?; Would you call yourself a nervous person?;  
43 Are you a worrier?; Would you call yourself tense or 'highly strung'?; Do you worry too long  
44 after an embarrassing experience?; Do you suffer from 'nerves'?; Do you often feel lonely?;  
45 Are you often troubled by feelings of guilt?. Higher scores indicate greater neuroticism.

### 46 47 48 49 50 51 52 53 54 *Data Analysis*

55 Cross tabulations performed to describe characteristics of those who reported tinnitus  
56 versus no tinnitus, and the subset of people with tinnitus who reported 'bothersome'  
57 tinnitus. Demographic, health, lifestyle and psychological characteristics were selected on  
58  
59  
60

1  
2  
3 the basis of previously being linked to tinnitus.(21, 28, 29) There were missing data for some  
4 measures primarily due to measures being added to the study protocol at different time  
5 points during data collection (see Table 2). Because the reason for the missing data was not  
6 systematically related to the outcomes of interest in this study, it was assumed that the data  
7 were missing completely at random. Missing variable analysis did not identify any pattern to  
8 the missing data. Multinomial logistic regression was used to model cross-sectional baseline  
9 associations between demographic, hearing, noise exposure, health and lifestyle factors and  
10 tinnitus (versus no tinnitus) and bothersome tinnitus (versus non-bothersome tinnitus). A  
11 Cox proportional hazard model was used to model the incidence of tinnitus and more  
12 bothersome tinnitus at 4 year follow-up. Analyses were performed with IBM SPSS version  
13 23.(30)

#### 24 25 *Patient and public involvement*

26 Patient and public involvement is reported according to the Guidance for Reporting  
27 Involvement of Patients and the Public (GRIPP) – short form 17. 1. Aim: UK Biobank  
28 consulted with stakeholders including the public at several times during the planning stages  
29 and post implementation to obtain guidance and feedback in relation to; consent,  
30 confidentiality, access, commercialisation, and oversight/monitoring. The conception of the  
31 project and its aim sprung directly from public enquiries fielded by the British Tinnitus  
32 Association a partner in this project. 2. Methods: For the UK Biobank, a key element in the  
33 public consultation process was an initial workshop which included 20 members of the  
34 public in the study target age range and 10 outside the target age range. Sessions key points  
35 were noted, and sessions tape recorded, a post workshop questionnaire was sent to all  
36 attendees, and to any stakeholders who were not able to attend the workshops in person  
37 (to increase representativeness). 3. Results: Public opinion across many areas addressed in  
38 the aims was diverse, a full report can be found at <http://www.ukbiobank.ac.uk/public-consultation/> 4. Discussion: Public input influenced ethical considerations, access to data,  
39 the consent process, the commercialisation of the resource, and oversight/monitoring. 5.  
40 Reflections/critical perspective: Public and other stakeholder input into the study was  
41 essential to ensure public confidence in the study conduct, and to respond to public  
42 concerns with the resource. Whilst efforts were taken to consider public input, the diversity  
43  
44  
45  
46  
47  
48  
49  
50  
51  
52  
53  
54  
55  
56  
57  
58  
59  
60

of opinion meant that not all perspectives were equally influential on the UK Biobank's design and conduct.

## Results

### *Cross-sectional analysis*

In this sample of adults aged 40 to 69 years, 17.7% (n = 29,861) reported tinnitus and 5.8% (n = 9,751) reported bothersome tinnitus. Table 2 summarises the characteristics of participants who reported that they experienced tinnitus versus those who did not report tinnitus. Characteristics of those who reported tinnitus are broken down further with respect to whether participants reported their tinnitus as being bothersome or not bothersome.

**Table 2. Sample characteristics**

|                                         | No tinnitus<br>N = 138,487 | Tinnitus                     |                                             |                                     |
|-----------------------------------------|----------------------------|------------------------------|---------------------------------------------|-------------------------------------|
|                                         |                            | Tinnitus (any)<br>N = 29,861 | Tinnitus<br>Not<br>bothersome<br>N = 20,110 | Tinnitus<br>Bothersome<br>N = 9,751 |
| Age (168,348)*                          | 56.4 (SD 8.2)              | 58.7 (SD 7.58)               | 57.5 (SD 8.22)                              | 58.0 (SD 7.78)                      |
| Sex (male; 168,348)                     | 44.0%                      | 52.80%                       | 51.0%                                       | 45.70%                              |
| Social economic status score* (168,079) | -1.12 (SD 2.92)            | -0.99 (SD 3.01)              | -1.02 (SD 3.00)                             | -0.66 (SD 3.16)                     |
| SRT better ear (157,574)                | -7.43 (SD 1.62)            | -7.07 (SD 1.96)              | -7.26 (SD 1.80)                             | -6.91 (SD 2.13)                     |
| Hearing difficulties (168,348)          | 21.3%                      | 56.4%                        | 43.4%                                       | 63.3%                               |
| Work noise exposure (166,805)           | 20.5%                      | 34.4%                        | 32.2%                                       | 37.0%                               |
| Music noise exposure (165,977)          | 11.5%                      | 16.6%                        | 17.4%                                       | 18.5%                               |
| Physical activity (106,989)             | 71.1%                      | 71.7%                        | 71.5%                                       | 69.3%                               |
| Ototoxic medication (168,348)           | 39.2%                      | 46.5%                        | 44.6%                                       | 53.1%                               |
| Alcohol drinker (168,201)               | 91.5%                      | 90.1%                        | 91.2%                                       | 88.1%                               |
| Current or previous smoking (167,725)   | 43.9%                      | 48.5%                        | 47.4%                                       | 50.7%                               |
| Metabolic risk (168,348)                | 9.1%                       | 12.0%                        | 10.7%                                       | 13.3%                               |
| Neuroticism score (136,600)             | 3.98 (SD 3.22)             | 4.63 (SD 3.41)               | 4.44 (SD 3.33)                              | 5.64 (SD 3.47)                      |

\*The number in brackets indicates the number of participants that completed each measure.

+Social economic status indexed by Townsend deprivation index score; lower (more negative) score indicate less deprived (more affluent) status

All variables were entered simultaneously into multi-variable logistic regression models for tinnitus (versus no tinnitus) and bothersome tinnitus (versus not bothersome) (Table 3).

Similar patterns of association were observed for tinnitus and bothersome tinnitus. The

Nagelkerke  $r^2$  was 0.143 for tinnitus and 0.067 for bothersome tinnitus. Older age, male sex, poorer speech recognition threshold, hearing difficulties, work noise exposure, music noise exposure, physical activity, regular use of ototoxic medication, and neuroticism were associated with tinnitus. Alcohol consumption was associated with lower odds of tinnitus. Female sex, most deprived social economic status, poorer speech recognition threshold, hearing difficulties, work noise exposure, ototoxic medication and neuroticism were associated with bothersome tinnitus. The sample included 1013 hearing aid users. The analyses were re-run to check for interactions with hearing difficulties and hearing aid use on tinnitus and bothersome tinnitus. There was no significant hearing aid by hearing difficulties interaction for tinnitus (OR 0.50 95% confidence interval 0.21 – 1.21,  $p = 0.125$ ) or bothersome tinnitus (OR 0.87 95% confidence interval 0.18 – 4.18,  $p = 0.888$ ).

**Table 3. Cross-sectional correlates of tinnitus and bothersome tinnitus**

|                                 | Tinnitus<br>N=80,380<br>$\chi^2(15) = 7110.23, p < 0.001$ |             |             |              | Bothersome tinnitus<br>N=21,690<br>$\chi^2(15) = 912.89, p < 0.001$ |             |             |              |
|---------------------------------|-----------------------------------------------------------|-------------|-------------|--------------|---------------------------------------------------------------------|-------------|-------------|--------------|
|                                 | 95% C.I. for EXP(B)                                       |             |             |              | 95% C.I. for EXP(B)                                                 |             |             |              |
|                                 | Exp(B)                                                    | Lower       | Upper       | p            | Exp(B)                                                              | Lower       | Upper       | p            |
| Age                             | <b>1.03</b>                                               | <b>1.03</b> | <b>1.03</b> | <b>0.000</b> | 1.00                                                                | 1.00        | 1.01        | 0.176        |
| Sex (male)                      | <b>1.20</b>                                               | <b>1.15</b> | <b>1.25</b> | <b>0.000</b> | <b>0.74</b>                                                         | <b>0.68</b> | <b>0.80</b> | <b>0.000</b> |
| Social economic status          |                                                           |             |             | 0.294        |                                                                     |             |             | 0.023        |
| First Quartile 1 (Reference)    |                                                           |             |             | -            |                                                                     |             |             | -            |
| Second Quartile                 | 1.02                                                      | 0.97        | 1.08        | 0.484        | 0.95                                                                | 0.86        | 1.05        | 0.297        |
| Third Quartile                  | 0.98                                                      | 0.93        | 1.04        | 0.480        | 1.03                                                                | 0.93        | 1.14        | 0.587        |
| Fourth Quartile (most deprived) | 1.03                                                      | 0.98        | 1.09        | 0.262        | <b>1.11</b>                                                         | <b>1.00</b> | <b>1.23</b> | <b>0.043</b> |
| SRT better ear                  | <b>1.03</b>                                               | <b>1.02</b> | <b>1.04</b> | <b>0.000</b> | <b>1.02</b>                                                         | <b>1.00</b> | <b>1.05</b> | <b>0.020</b> |
| Hearing difficulties (yes)      | <b>3.75</b>                                               | <b>3.60</b> | <b>3.90</b> | <b>0.000</b> | <b>2.07</b>                                                         | <b>1.92</b> | <b>2.23</b> | <b>0.000</b> |
| Work noise exposure (yes)       | <b>1.40</b>                                               | <b>1.34</b> | <b>1.47</b> | <b>0.000</b> | <b>1.15</b>                                                         | <b>1.06</b> | <b>1.25</b> | <b>0.001</b> |
| Music noise exposure (yes)      | <b>1.39</b>                                               | <b>1.31</b> | <b>1.47</b> | <b>0.000</b> | 1.03                                                                | 0.93        | 1.13        | 0.576        |
| Physical activity (yes)         | <b>1.05</b>                                               | <b>1.00</b> | <b>1.09</b> | <b>0.038</b> | 0.97                                                                | 0.89        | 1.04        | 0.372        |
| Ototoxic medication (yes)       | <b>1.18</b>                                               | <b>1.13</b> | <b>1.23</b> | <b>0.000</b> | <b>1.19</b>                                                         | <b>1.11</b> | <b>1.28</b> | <b>0.000</b> |



|                                   |             |             |             |              |             |             |             |              |
|-----------------------------------|-------------|-------------|-------------|--------------|-------------|-------------|-------------|--------------|
| Alcohol drinker (yes)             | <b>0.87</b> | <b>0.80</b> | <b>0.93</b> | <b>0.000</b> | 0.89        | 0.78        | 1.01        | 0.070        |
| Current or previous smoking (yes) | 0.99        | 0.95        | 1.03        | 0.500        | 1.04        | 0.97        | 1.12        | 0.300        |
| Metabolic risk (yes)              | 1.05        | 0.98        | 1.12        | 0.210        | 0.97        | 0.86        | 1.09        | 0.601        |
| Neuroticism score                 | <b>1.05</b> | <b>1.04</b> | <b>1.06</b> | <b>0.000</b> | <b>1.10</b> | <b>1.08</b> | <b>1.11</b> | <b>0.000</b> |

### Longitudinal analysis

A subset of participants (3997 people) who had completed the questions about tinnitus and the full set of correlates of interest were included in the longitudinal analysis, with a mean retest interval of 4.3 years (2-7 years range). There were 276 cases of incident tinnitus among the 3,177 people who did not report tinnitus at baseline; a 4 year incidence of 8.7%. The Cox proportional hazard model for incident tinnitus between baseline and 4 year follow-up was not statistically significant ( $\chi^2(15) = 21.6, p = 0.119$ ). Among the 820 people who reported tinnitus at baseline and completed responses at follow-up, 150 reported no tinnitus at follow-up (including 63 who claimed never to have had tinnitus); 18.3% of people reporting tinnitus at baseline did not report tinnitus at follow-up. Hearing difficulties were associated with reduced likelihood of no tinnitus at follow-up (Table 4).

**Table 4. Cox proportional hazard model for no tinnitus at follow-up (i.e. resolved tinnitus)**

|                                 | Resolved tinnitus<br>N=565<br>( $\chi^2(15) = 26.7, p = 0.031$ )<br>95% confidence interval |             |             |              |
|---------------------------------|---------------------------------------------------------------------------------------------|-------------|-------------|--------------|
|                                 | $\beta$                                                                                     | Lower       | Upper       | <i>p</i>     |
| Age                             | 0.99                                                                                        | 0.96        | 1.03        | 0.683        |
| Sex (male)                      | 0.96                                                                                        | 0.62        | 1.47        | 0.841        |
| Social economic status          |                                                                                             |             |             | 0.558        |
| First Quartile 1 (Reference)    |                                                                                             |             |             | -            |
| Second Quartile                 | 1.11                                                                                        | 0.69        | 1.80        | 0.671        |
| Third Quartile                  | 0.72                                                                                        | 0.39        | 1.30        | 0.273        |
| Fourth Quartile (most deprived) | 1.01                                                                                        | 0.55        | 1.85        | 0.972        |
| SRT better ear                  | 0.98                                                                                        | 0.88        | 1.10        | 0.735        |
| Hearing difficulties (yes)      | <b>0.48</b>                                                                                 | <b>0.32</b> | <b>0.74</b> | <b>0.001</b> |
| Work noise exposure (yes)       | 1.47                                                                                        | 0.95        | 2.26        | 0.080        |
| Music noise exposure (yes)      | 1.26                                                                                        | 0.76        | 2.09        | 0.379        |



|                                   |      |      |      |       |
|-----------------------------------|------|------|------|-------|
| Physical activity (yes)           | 1.48 | 0.84 | 2.58 | 0.173 |
| Ototoxic medication (yes)         | 0.83 | 0.55 | 1.25 | 0.383 |
| Alcohol drinker (yes)             | 0.66 | 0.30 | 1.47 | 0.309 |
| Current or previous smoking (yes) | 1.19 | 0.79 | 1.78 | 0.399 |
| Metabolic risk (yes)              | 0.66 | 0.35 | 1.25 | 0.203 |
| Neuroticism score                 | 1.05 | 0.99 | 1.12 | 0.101 |

Among the 1,039 people who completed questions about tinnitus annoyance at baseline and follow-up, 850 (81.8%) reported no change, 93 (9%) reported that their tinnitus was more bothersome and 93 (9%) reported their tinnitus being less bothersome.

In a Cox proportional hazard model, cases of tinnitus being reported as being more bothersome (versus those reporting no change) were associated with higher (poorer) better ear SRT, non-drinking and female gender (Table 5). The sample included 27 hearing aid users, and the model was re-run to check for an interaction with hearing aid use and speech reception threshold. The interaction was not statistically significant (OR 0.88, 95% confidence interval 0.67 – 1.14,  $p = 0.337$ ). The model for reduced bothersomeness was not statistically significant  $\chi^2(15) = 24.1$ ,  $p = 0.063$ .

**Table 5. Cox proportional hazard model for tinnitus bothersomeness worse**

|                                 | Bothersomeness worse<br>N=404<br>$\chi^2(15) = 34.4$ , $p = 0.003$<br>95% confidence interval |             |             |              |
|---------------------------------|-----------------------------------------------------------------------------------------------|-------------|-------------|--------------|
|                                 | $\beta$                                                                                       | Lower       | Upper       | $p$          |
| Age                             | 0.98                                                                                          | 0.93        | 1.04        | 0.481        |
| Sex (male)                      | <b>0.44</b>                                                                                   | <b>0.22</b> | <b>0.86</b> | <b>0.017</b> |
| Social economic status          |                                                                                               |             |             | 0.258        |
| First Quartile 1 (Reference)    |                                                                                               |             |             | -            |
| Second Quartile                 | 1.66                                                                                          | 0.80        | 3.48        | 0.176        |
| Third Quartile                  | 0.77                                                                                          | 0.27        | 2.23        | 0.633        |
| Fourth Quartile (most deprived) | 0.77                                                                                          | 0.27        | 2.19        | 0.621        |
| SRT better ear                  | <b>1.13</b>                                                                                   | <b>1.02</b> | <b>1.27</b> | <b>0.026</b> |
| Hearing difficulties (yes)      | 2.01                                                                                          | 0.96        | 4.20        | 0.063        |
| Work noise exposure (yes)       | 1.41                                                                                          | 0.71        | 2.83        | 0.329        |
| Music noise exposure (yes)      | 1.15                                                                                          | 0.50        | 2.63        | 0.738        |
| Physical activity (yes)         | 0.88                                                                                          | 0.39        | 1.96        | 0.752        |

|                                   |             |             |             |              |
|-----------------------------------|-------------|-------------|-------------|--------------|
| Ototoxic medication (yes)         | 1.24        | 0.65        | 2.34        | 0.513        |
| Alcohol drinker (yes)             | <b>0.30</b> | <b>0.11</b> | <b>0.87</b> | <b>0.026</b> |
| Current or previous smoking (yes) | 1.61        | 0.83        | 3.11        | 0.156        |
| Metabolic risk (yes)              | 0.67        | 0.22        | 2.04        | 0.485        |
| Neuroticism score                 | 0.95        | 0.86        | 1.06        | 0.381        |

## Discussion

In cross-sectional analysis, 17.7% of adults 40-69 years old reported tinnitus, with 5.8% reporting that tinnitus was bothersome. The 4 year incidence of tinnitus in this sample was 8.7%. The study offered some cause for optimism with respect to the natural history of tinnitus; around 18% of people who reported tinnitus at baseline did not report tinnitus at follow-up, an average of 4 years later. For those that continued to experience tinnitus, 81.8% reported that tinnitus bothersomeness was unchanged after 4 years, 9% reported tinnitus became worse (previously not bothersome, now bothersome), and in 9% better (previously bothersome, now not). The strengths of the study include the large inclusive sample, which was not derived from a specific tinnitus nor hearing study. The availability of longitudinal data was a significant strength. Longitudinal tinnitus data are available in a very small number of other studies. The use of standard tinnitus phenotype questions allowed comparison of these results with those of other studies. Although accounted for in the model, the variability in time elapsed at retest (2-7 years) may be a limitation. However the minimum of 2 years is longer than the period of most intervention studies and provides time to observe natural variation in tinnitus. In terms of patient counselling about long term prognoses for tinnitus, the 4 year mean follow up period limits the certainty of any opinion in relation to longer-term outcomes. Further, there is the possibility that a person may have received clinical help for tinnitus during the intervening years. Most people seek help within the first year of onset,(31) so this is unlikely to have been the case for a large proportion of participants here. Unfortunately, information about receiving clinical help and the duration of tinnitus was not available in this study.

### *Tinnitus correlates*

Poorer hearing (better ear SRT and self reported hearing difficulties) was associated with the presence of tinnitus and bothersome tinnitus. Hearing difficulties were associated with

1  
2  
3 lower likelihood of resolved tinnitus and SRT with lower likelihood of tinnitus being less  
4 bothersome over time. But there was no relationship between SRT or hearing difficulties  
5 and incident tinnitus. A relationship between tinnitus and hearing loss is consistently  
6 reported (21, 32-35) with hearing loss being proposed as a trigger for tinnitus which then  
7 persists due to maladaptive plasticity in the central auditory and associated systems.(36)  
8  
9 The lack of a relationship between hearing and incident tinnitus may be due to the much  
10 smaller sample for the longitudinal analysis versus the cross-sectional analysis. Work noise  
11 exposure was associated with prevalent tinnitus and bothersome tinnitus. Music exposure  
12 was associated with prevalent tinnitus. Noise exposure is the primary modifiable risk factor  
13 for tinnitus (33, 37, 38) and the pathophysiological impact can be either cochlear hair cell  
14 dysfunction, leading to a subjective hearing loss, and/or cochlear synaptopathy, the effects  
15 of which are more subtle.(39)  
16  
17  
18  
19  
20  
21  
22  
23  
24  
25  
26

27 Alcohol consumption was associated with reduced odds of tinnitus, but not of bothersome  
28 tinnitus. Moderate alcohol consumption has been suggested to have a protective effect on  
29 hearing, perhaps via cardiovascular pathways. (40, 41) Other studies reported no  
30 association between alcohol consumption and tinnitus (42, 43), with one study reporting  
31 increased risk of tinnitus with alcohol consumption.(41) There are several difficulties with  
32 disentangling the effect of alcohol consumption on tinnitus. First, alcohol consumption is  
33 highly confounded with socio-cultural factors that may also impact on health, including  
34 hearing.(44) Second, impacts of alcohol consumption may be dose-dependent; heavy  
35 alcohol consumption is certainly bad for general health, including hearing.(45) Impacts may  
36 be different for moderate or light levels of consumption.(45-47) Third, comparing health  
37 outcomes in drinkers versus non-drinkers may give the false impression that alcohol  
38 consumptions is linked to better health outcomes due to the inclusion of people who have  
39 given up drinking due to poor health in the non-drinker group ('sick-quitters').(40, 48) The  
40 detailed level of analysis in relation to these questions is beyond the scope of the present  
41 paper, and should be the subject of future investigation.  
42  
43  
44  
45  
46  
47  
48  
49  
50  
51  
52  
53  
54  
55

56 Interestingly, males were more likely to report tinnitus but females more likely to report  
57 tinnitus being bothersome. One explanation may be that because men are more likely to  
58 have hearing loss,(49) they are more likely to experience tinnitus. But men may be less likely  
59  
60

1  
2  
3 to report tinnitus as being bothersome due to differences in socialization that leads to men  
4 being less likely to acknowledge and report discomfort in relation to physical symptoms in  
5 general.(50)  
6  
7  
8  
9

10 Use of ototoxic medication was associated with prevalent tinnitus and bothersome tinnitus,  
11 but not with incidence tinnitus or changes in bothersomeness. The association between  
12 tinnitus and ototoxic medication is supported by other literature(51) as is the adverse effect  
13 on quality of life that results.(52) Though an association between smoking and tinnitus has  
14 been reported previously,(28, 53) there were no associations with tinnitus in the present  
15 analysis. Both metabolic syndrome and lack of physical activity have previously been  
16 associated with tinnitus (54) and tinnitus bothersomeness,(55, 56) whilst physical activity was  
17 weakly associated with tinnitus in the current study. The relatively low baseline for being  
18 physically active (10 minutes daily moderate activity), and self report measure in the current  
19 study may help to explain this apparent anomaly. Previous studies utilising accelerometers  
20 have indicated that applying higher thresholds for physical activity produced more  
21 pronounced associations in older adult populations.(54)  
22  
23  
24  
25  
26  
27  
28  
29  
30  
31  
32  
33

34 Taken together, there is an indication that generally healthy lifestyle may be linked to  
35 reduced likelihood of tinnitus. Variations in findings relating to both factors across studies  
36 may relate to differences in measurement and the fact that both are also strongly  
37 associated with age, socioeconomic status, and sex. A limitation of the study is that the  
38 sample sizes were substantially lower for the longitudinal analyses; lack of longitudinal  
39 associations may be due to lack of statistical power. The analysis did not include potentially  
40 important explanatory factors (for example, personality factors besides neuroticism, leisure  
41 noise, and genetic factors) and some factors may not have been well captured by the  
42 measures available in this data set. For example, work- and music-related noise exposure  
43 was based on a self-report measure which corresponds to noise levels above 85 dB(A).(25)  
44 But the measure does not account for levels that may substantially exceed 85 dB(A) nor for  
45 the use or non-use of ear protection.  
46  
47  
48  
49  
50  
51  
52  
53  
54  
55  
56

57  
58 A key limitation of the present study – and all other tinnitus research - is the lack of a  
59 reliable measure of tinnitus, and no agreement about the validity or characterisation of  
60

1  
2  
3 tinnitus phenotypes.(57) This point was highlighted in the present study: Of those originally  
4 reporting tinnitus with subsequent cessation at follow up, over one third now claimed never  
5 to have had tinnitus. This finding calls into question the reliability of the current self-report  
6 measures of tinnitus utilised in epidemiological research and suggests that a collaborative  
7 effort to arrive at a refined definition and appropriate measure of tinnitus should be made.  
8  
9 There were no interactions between prevalent tinnitus, tinnitus bothersomeness or change  
10 in tinnitus bothersomeness with hearing aid use. These data suggest that poor hearing is the  
11 main driver of the risk of tinnitus, but that this is not offset by hearing aid use. Clinical  
12 experience, case series,(58) and retrospective studies(59) indicate that hearing aids can  
13 reduce or inhibit tinnitus, although to date no controlled trials have shown the benefits of  
14 hearing aids on tinnitus.(60) Given the modest and uncertain impact of hearing aids, public  
15 health approaches should focus on primary prevention of hearing loss in order to reduce the  
16 impacts of tinnitus. Additionally, given the largely persistent nature of tinnitus shown in the  
17 study, further attention should be paid to effectively managing symptoms in people with  
18 tinnitus, and ultimately to finding a cure.  
19  
20  
21  
22  
23  
24  
25  
26  
27  
28  
29  
30  
31

### 32 **Acknowledgements, Competing Interests, Funding**

33 PD is supported by the NIHR Manchester Biomedical Research Centre and DB by the NIHR  
34 Nottingham Biomedical Research Centre however the views expressed are not necessarily  
35 those of the NIHR, the NHS, or the Department of Health and Social Care. The Open Access  
36 publication fee for this paper was paid by the British Tinnitus Association.  
37  
38  
39  
40  
41  
42  
43  
44

### 45 **Author contributions**

46 Piers Dawes; Writing, editing, statistical analysis

47 John Newall; Writing, editing

48 David Stockdale; Writing, editing

49 David M. Baguley; Writing, editing  
50  
51  
52  
53  
54  
55  
56  
57  
58  
59  
60

## References

1. Baguley D, McFerran D, Hall D. Tinnitus. *The Lancet*. 2013;382(9904):1600-7.
2. Stockdale D, McFerran D, Brazier P, Pritchard C, Kay T, Dowrick C, et al. An economic evaluation of the healthcare cost of tinnitus management in the UK. *BMC Health Serv Res*. 2017;17(1):577.
3. Andersson G, Vretblad P, Larsen HC, Lyttkens L. Longitudinal follow-up of tinnitus complaints. *Archives of Otolaryngology–Head & Neck Surgery*. 2001;127(2):175-9.
4. Clifford RE, Baker D, Risbrough VB, Huang M, Yurgil KA. Impact of TBI, PTSD, and hearing loss on tinnitus progression in a US Marine cohort. *Mil Med*. 2019;184(11-12):839-46.
5. Stouffer J, Tyler RS, Kileny PR, Dalzell LE. Tinnitus as a function of duration and etiology: counselling implications. *The American journal of otology*. 1991;12(3):188-94.
6. Phillips JS, McFerran DJ, Hall DA, Hoare DJ. The natural history of subjective tinnitus in adults: A systematic review and meta-analysis of no-intervention periods in controlled trials. *The Laryngoscope*. 2018;128(1):217-27.
7. Duckert LG, Rees TS. Placebo effect in tinnitus management. *Otolaryngology—Head and Neck Surgery*. 1984;92(6):697-9.
8. Drew S, Davies E. Effectiveness of Ginkgo biloba in treating tinnitus: double blind, placebo controlled trial. *BMJ*. 2001;322(7278):73.
9. Robinson SK, Viirre ES, Bailey KA, Gerke MA, Harris JP, Stein MB. Randomized placebo-controlled trial of a selective serotonin reuptake inhibitor in the treatment of nondepressed tinnitus subjects. *Psychosom Med*. 2005;67(6):981-8.
10. Smith P, Coles R. Epidemiology of tinnitus: an update. In: Feldmann H, editor. *Proceedings of the third international tinnitus seminar, Karlsruhe: Harsch*. 1987. p. 147-53.
11. Davis A. *Hearing in adults: the prevalence and distribution of hearing impairment and reported hearing disability in the MRC Institute of Hearing Research's National Study of Hearing*: Whurr Publishers London; 1995.
12. Nondahl DM, Cruickshanks KJ, Wiley TL, Klein R, Klein BE, Tweed TS. Prevalence and 5-year incidence of tinnitus among older adults: the epidemiology of hearing loss study. *J Am Acad Audiol*. 2002;13(6):323-31.
13. Gopinath B, McMahon CM, Rochtchina E, Karpa MJ, Mitchell P. Incidence, persistence, and progression of tinnitus symptoms in older adults: the Blue Mountains Hearing Study. *Ear Hear*. 2010;31(3):407-12.
14. Lee HM, Do Han K, Kong SK, Nam EC, Park SN, Shim HJ, et al. Epidemiology of clinically significant tinnitus: a 10-year trend from nationwide health claims data in South Korea. *Otol Neurotol*. 2018;39(6):680-7.
15. Martinez C, Wallenhorst C, McFerran D, Hall DA. Incidence rates of clinically significant tinnitus: 10-year trend from a cohort study in England. *Ear Hear*. 2015;36(3):e69.
16. Nondahl DM, Cruickshanks KJ, Wiley TL, Klein BE, Klein R, Chappell R, et al. The ten-year incidence of tinnitus among older adults. *Int J Audiol*. 2010;49(8):580-5.
17. Collins R. What makes UK Biobank special? *The Lancet*. 2012;9822(379):1173-4.
18. Fry A, Littlejohns TJ, Sudlow C, Doherty N, Adamska L, Sprosen T, et al. Comparison of sociodemographic and health-related characteristics of UK Biobank participants with those of the general population. *Am J Epidemiol*. 2017;186(9):1026-34.
19. Norman P. Identifying change over time in small area socio-economic deprivation. *Applied Spatial Analysis and Policy*. 2010;3(2-3):107-38.

- 1
- 2
- 3 20. Davis A, Rafea EA. Epidemiology of tinnitus. In: Tyler RS, editor. Tinnitus handbook
- 4 Sandiego, CA: Singular; 2000. p. 1-23.
- 5
- 6 21. Gopinath B, McMahon CM, Rochtchina E, Karpa MJ, Mitchell P. Risk factors and
- 7 impacts of incident tinnitus in older adults. *Ann Epidemiol.* 2010;20(2):129-35.
- 8
- 9 22. Davis AC. The prevalence of hearing impairment and reported hearing disability
- 10 among adults in Great Britain. *International Journal of Epidemiology.* 1989;18(4):911-7.
- 11
- 12 23. Smits C, Kapteyn TS, Houtgast T. Development and validation of an automatic
- 13 speech-in-noise screening test by telephone. *Int J Audiol.* 2004;43(1):15-28.
- 14
- 15 24. Hall J. The development of a new English sentence in noise test and an English
- 16 number recognition test. Southampton: University of Southampton. 2006.
- 17
- 18 25. Health and Safety Executive. Noise at work. Guidance on regulation. London: HMSO;
- 19 1989.
- 20
- 21 26. National Cholesterol Education Program. Expert Panel on Detection, Evaluation, and
- 22 treatment of high blood cholesterol in Adults (Adult treatment Panel III). Third report of the
- 23 National cholesterol Education Program (NCEP) Expert Panel on Detection, Evaluation, and
- 24 treatment of high blood cholesterol in Adults (Adult treatment Panel III) final report.
- 25 *Circulation.* 2002;106(25):3143-421.
- 26
- 27 27. Eysenck H. Manual of the Eysenck personality inventory. Univ of London Press,
- 28 London. 1964.
- 29
- 30 28. Shargorodsky J, Curhan GC, Farwell WR. Prevalence and characteristics of tinnitus
- 31 among US adults. *The American journal of medicine.* 2010;123(8):711-8.
- 32
- 33 29. McCormack A, Edmondson-Jones M, Fortnum H, Dawes P, Middleton H, Munro KJ, et
- 34 al. The prevalence of tinnitus and the relationship with neuroticism in a middle-aged UK
- 35 population. *J Psychosom Res.* 2014;76(1):56-60.
- 36
- 37 30. IBM Corp. IBM SPSS Statistics for Windows, Version 23.0. Armonk, NY
- 38 IBM Corp.; 2015.
- 39
- 40 31. McFerran D, Hoare DJ, Carr S, Ray J, Stockdale D. Tinnitus services in the United
- 41 Kingdom: a survey of patient experiences. *BMC Health Serv Res.* 2018;18(1):110.
- 42
- 43 32. Kim H-J, Lee H-J, An S-Y, Sim S, Park B, Kim SW, et al. Analysis of the prevalence and
- 44 associated risk factors of tinnitus in adults. *PLoS One.* 2015;10(5).
- 45
- 46 33. Nondahl DM, Cruickshanks KJ, Huang G-H, Klein BE, Klein R, Javier Nieto F, et al.
- 47 Tinnitus and its risk factors in the Beaver Dam offspring study. *Int J Audiol.* 2011;50(5):313-
- 48 20.
- 49
- 50 34. Gallus S, Lugo A, Garavello W, Bosetti C, Santoro E, Colombo P, et al. Prevalence and
- 51 determinants of tinnitus in the Italian adult population. *Neuroepidemiology.* 2015;45(1):12-
- 52 9.
- 53
- 54 35. Michikawa T, Nishiwaki Y, Kikuchi Y, Saito H, Mizutari K, Okamoto M, et al.
- 55 Prevalence and factors associated with tinnitus: a community-based study of Japanese
- 56 elders. *J Epidemiol.* 2010:271-6.
- 57
- 58 36. Shore SE, Roberts LE, Langguth B. Maladaptive plasticity in tinnitus—triggers,
- 59 mechanisms and treatment. *Nature Reviews Neurology.* 2016;12(3):150.
- 60
37. Bhatt JM, Lin HW, Bhattacharyya N. Prevalence, severity, exposures, and treatment
- patterns of tinnitus in the United States. *JAMA Otolaryngology–Head & Neck Surgery.*
- 2016;142(10):959-65.
38. Axelsson A, Prasher D. Tinnitus induced by occupational and leisure noise. *Noise and*
- Health.* 2000;2(8):47.



- 1
  - 2
  - 3
  - 4
  - 5
  - 6
  - 7
  - 8
  - 9
  - 10
  - 11
  - 12
  - 13
  - 14
  - 15
  - 16
  - 17
  - 18
  - 19
  - 20
  - 21
  - 22
  - 23
  - 24
  - 25
  - 26
  - 27
  - 28
  - 29
  - 30
  - 31
  - 32
  - 33
  - 34
  - 35
  - 36
  - 37
  - 38
  - 39
  - 40
  - 41
  - 42
  - 43
  - 44
  - 45
  - 46
  - 47
  - 48
  - 49
  - 50
  - 51
  - 52
  - 53
  - 54
  - 55
  - 56
  - 57
  - 58
  - 59
  - 60
39. Liberman MC. Noise-induced and age-related hearing loss: new perspectives and potential therapies. *F1000Research*. 2017;6(927).
40. Dawes P, Cruickshanks KJ, Moore DR, Edmondson-Jones M, McCormack A, Fortnum H, et al. Cigarette smoking, passive smoking, alcohol consumption, and hearing loss. *Journal of the Association for Research in Otolaryngology*. 2014;15(4):663-74.
41. Quaranta A, Assennato G, Sallustio V. Epidemiology of hearing problems among adults in Italy. *Scand Audiol Suppl*. 1996;42:9-13.
42. Sindhusake D, Golding M, Wigney D, Newall P, Jakobsen K, Mitchell P. Factors predicting severity of tinnitus: a population-based assessment. *J Am Acad Audiol*. 2004;15(4):269-80.
43. Sindhusake D, Golding M, Newall P, Rubin G, Jakobsen K, Mitchell P. Risk factors for tinnitus in a population of older adults: the blue mountains hearing study. *Ear Hear*. 2003;24(6):501-7.
44. Rimm EB, Giovannucci EL, Willett WC, Colditz GA, Ascherio A, Rosner B, et al. Prospective study of alcohol consumption and risk of coronary disease in men. *The Lancet*. 1991;338(8765):464-8.
45. Popelka MM, Cruickshanks KJ, Wiley TL, Tweed TS, Klein BE, Klein R, et al. Moderate alcohol consumption and hearing loss: a protective effect. *J Am Geriatr Soc*. 2000;48(10):1273-8.
46. Gopinath B, Flood V, McMahon C, Burlutsky G, Smith W, Mitchell P. The effects of smoking and alcohol consumption on age-related hearing loss: the Blue Mountains Hearing Study. *Ear Hear*. 2010;31(2):277-82.
47. Itoh A, Nakashima T, Arao H, Wakai K, Tamakoshi A, Kawamura T, et al. Smoking and drinking habits as risk factors for hearing loss in the elderly: epidemiological study of subjects undergoing routine health checks in Aichi, Japan. *Public Health*. 2001;115(3):192-6.
48. Hines L, Rimm E. Moderate alcohol consumption and coronary heart disease: a review. *Postgrad Med J*. 2001;77(914):747-52.
49. Cruickshanks KJ, Wiley TL, Tweed TS, Klein BE, Klein R, Mares-Perlman JA, et al. Prevalence of hearing loss in older adults in Beaver Dam, Wisconsin: The epidemiology of hearing loss study. *Am J Epidemiol*. 1998;148(9):879-86.
50. Barsky AJ, Peekna HM, Borus JF. Somatic symptom reporting in women and men. *J Gen Intern Med*. 2001;16(4):266-75.
51. Dille MF, Konrad-Martin D, Gallun F, Helt WJ, Gordon JS, Reavis KM, et al. Tinnitus onset rates from chemotherapeutic agents and ototoxic antibiotics: results of a large prospective study. *J Am Acad Audiol*. 2010;21(6):409-17.
52. Pearson SE, Taylor J, Patel P, Baguley DM. Cancer survivors treated with platinum-based chemotherapy affected by ototoxicity and the impact on quality of life: a narrative synthesis systematic review. *Int J Audiol*. 2019;58(11):685-95.
53. Veile A, Zimmermann H, Lorenz E, Becher H. Is smoking a risk factor for tinnitus? A systematic review, meta-analysis and estimation of the population attributable risk in Germany. *BMJ open*. 2018;8(2):e016589.
54. Loprinzi PD, Lee H, Gilham B, Cardinal BJ. Association between accelerometer-assessed physical activity and tinnitus, NHANES 2005–2006. *Res Q Exerc Sport*. 2013;84(2):177-85.
55. Carpenter-Thompson JR, McAuley E, Husain FT. Physical activity, tinnitus severity, and improved quality of life. *Ear Hear*. 2015;36(5):574-81.



- 1  
2  
3 56. Stuerz K, Lafenthaler M, Pfaffenberger N, Kopp M, Gutweniger S, Guenther V. Body  
4 image and body concept in patients with chronic tinnitus. *Eur Arch Otorhinolaryngol.*  
5 2009;266(7):961-5.  
6  
7 57. McFerran DJ, Stockdale DJ, Holme R, Large CH, Baguley DM. Why is there no cure for  
8 tinnitus? *Front Neurosci.* 2019;13:802.  
9  
10 58. Trotter M, Donaldson I. Hearing aids and tinnitus therapy: a 25-year experience. *The*  
11 *Journal of Laryngology & Otology.* 2008;122(10):1052-6.  
12  
13 59. Searchfield GD, Kaur M, Martin WH. Hearing aids as an adjunct to counseling:  
14 Tinnitus patients who choose amplification do better than those that don't. *Int J Audiol.*  
15 2010;49(8):574-9.  
16  
17 60. Hoare DJ, Edmondson-Jones M, Sereda M, Akeroyd MA, Hall D. Amplification with  
18 hearing aids for patients with tinnitus and co-existing hearing loss. *Cochrane Database Syst*  
19 *Rev.* 2014(1).  
20  
21  
22  
23  
24  
25  
26  
27  
28  
29  
30  
31  
32  
33  
34  
35  
36  
37  
38  
39  
40  
41  
42  
43  
44  
45  
46  
47  
48  
49  
50  
51  
52  
53  
54  
55  
56  
57  
58  
59  
60

# Reporting checklist for cross sectional study.

Based on the STROBE cross sectional guidelines.

## Instructions to authors

Complete this checklist by entering the page numbers from your manuscript where readers will find each of the items listed below.

Your article may not currently address all the items on the checklist. Please modify your text to include the missing information. If you are certain that an item does not apply, please write "n/a" and provide a short explanation.

Upload your completed checklist as an extra file when you submit to a journal.

In your methods section, say that you used the STROBE cross sectional reporting guidelines, and cite them as:

von Elm E, Altman DG, Egger M, Pocock SJ, Gøtzsche PC, Vandenbroucke JP. The Strengthening the Reporting of Observational Studies in Epidemiology (STROBE) Statement: guidelines for reporting observational studies.

|                           |                     |                                                                                                 | Page<br>Number |
|---------------------------|---------------------|-------------------------------------------------------------------------------------------------|----------------|
| <b>Title and abstract</b> |                     |                                                                                                 |                |
| Title                     | <a href="#">#1a</a> | Indicate the study's design with a commonly used term in the title or the abstract              | 1              |
| Abstract                  | <a href="#">#1b</a> | Provide in the abstract an informative and balanced summary of what was done and what was found | 2              |
| <b>Introduction</b>       |                     |                                                                                                 |                |
| Background / rationale    | <a href="#">#2</a>  | Explain the scientific background and rationale for the investigation being reported            | 4              |
| Objectives                | <a href="#">#3</a>  | State specific objectives, including any prespecified hypotheses                                | 5              |
| <b>Methods</b>            |                     |                                                                                                 |                |
| Study design              | <a href="#">#4</a>  | Present key elements of study design early in the paper                                         | 6              |
| Setting                   | <a href="#">#5</a>  | Describe the setting, locations, and relevant dates, including periods of                       | 7              |

recruitment, exposure, follow-up, and data collection

|    |                      |                      |                                                                                                                                                                                                                                                                                        |
|----|----------------------|----------------------|----------------------------------------------------------------------------------------------------------------------------------------------------------------------------------------------------------------------------------------------------------------------------------------|
| 1  |                      |                      |                                                                                                                                                                                                                                                                                        |
| 2  |                      |                      |                                                                                                                                                                                                                                                                                        |
| 3  | Eligibility criteria | <a href="#">#6a</a>  | Give the eligibility criteria, and the sources and methods of selection of participants. 6                                                                                                                                                                                             |
| 4  |                      |                      |                                                                                                                                                                                                                                                                                        |
| 5  |                      |                      |                                                                                                                                                                                                                                                                                        |
| 6  |                      | <a href="#">#7</a>   | Clearly define all outcomes, exposures, predictors, potential confounders, and effect modifiers. Give diagnostic criteria, if applicable 7-10                                                                                                                                          |
| 7  |                      |                      |                                                                                                                                                                                                                                                                                        |
| 8  |                      |                      |                                                                                                                                                                                                                                                                                        |
| 9  |                      |                      |                                                                                                                                                                                                                                                                                        |
| 10 | Data sources /       | <a href="#">#8</a>   | For each variable of interest give sources of data and details of methods of assessment (measurement). Describe comparability of assessment methods if there is more than one group. Give information separately for for exposed and unexposed groups if applicable. 7-10              |
| 11 | measurement          |                      |                                                                                                                                                                                                                                                                                        |
| 12 |                      |                      |                                                                                                                                                                                                                                                                                        |
| 13 |                      |                      |                                                                                                                                                                                                                                                                                        |
| 14 |                      |                      |                                                                                                                                                                                                                                                                                        |
| 15 |                      |                      |                                                                                                                                                                                                                                                                                        |
| 16 |                      |                      |                                                                                                                                                                                                                                                                                        |
| 17 | Bias                 | <a href="#">#9</a>   | Describe any efforts to address potential sources of bias 6                                                                                                                                                                                                                            |
| 18 |                      |                      |                                                                                                                                                                                                                                                                                        |
| 19 | Study size           | <a href="#">#10</a>  | Explain how the study size was arrived at 6                                                                                                                                                                                                                                            |
| 20 |                      |                      |                                                                                                                                                                                                                                                                                        |
| 21 | Quantitative         | <a href="#">#11</a>  | Explain how quantitative variables were handled in the analyses. If applicable, describe which groupings were chosen, and why 9-10                                                                                                                                                     |
| 22 | variables            |                      |                                                                                                                                                                                                                                                                                        |
| 23 |                      |                      |                                                                                                                                                                                                                                                                                        |
| 24 |                      |                      |                                                                                                                                                                                                                                                                                        |
| 25 | Statistical          | <a href="#">#12a</a> | Describe all statistical methods, including those used to control for confounding 9-10                                                                                                                                                                                                 |
| 26 | methods              |                      |                                                                                                                                                                                                                                                                                        |
| 27 |                      |                      |                                                                                                                                                                                                                                                                                        |
| 28 |                      |                      |                                                                                                                                                                                                                                                                                        |
| 29 | Statistical          | <a href="#">#12b</a> | Describe any methods used to examine subgroups and interactions 9-10                                                                                                                                                                                                                   |
| 30 | methods              |                      |                                                                                                                                                                                                                                                                                        |
| 31 |                      |                      |                                                                                                                                                                                                                                                                                        |
| 32 |                      |                      |                                                                                                                                                                                                                                                                                        |
| 33 | Statistical          | <a href="#">#12c</a> | Explain how missing data were addressed 9-10                                                                                                                                                                                                                                           |
| 34 | methods              |                      |                                                                                                                                                                                                                                                                                        |
| 35 |                      |                      |                                                                                                                                                                                                                                                                                        |
| 36 |                      |                      |                                                                                                                                                                                                                                                                                        |
| 37 | Statistical          | <a href="#">#12d</a> | If applicable, describe analytical methods taking account of sampling strategy n/a                                                                                                                                                                                                     |
| 38 | methods              |                      |                                                                                                                                                                                                                                                                                        |
| 39 |                      |                      |                                                                                                                                                                                                                                                                                        |
| 40 |                      |                      |                                                                                                                                                                                                                                                                                        |
| 41 | Statistical          | <a href="#">#12e</a> | Describe any sensitivity analyses n/a                                                                                                                                                                                                                                                  |
| 42 | methods              |                      |                                                                                                                                                                                                                                                                                        |
| 43 |                      |                      |                                                                                                                                                                                                                                                                                        |
| 44 | <b>Results</b>       |                      |                                                                                                                                                                                                                                                                                        |
| 45 |                      |                      |                                                                                                                                                                                                                                                                                        |
| 46 | Participants         | <a href="#">#13a</a> | Report numbers of individuals at each stage of study—eg numbers potentially eligible, examined for eligibility, confirmed eligible, included in the study, completing follow-up, and analysed. Give information separately for for exposed and unexposed groups if applicable. 10 & 12 |
| 47 |                      |                      |                                                                                                                                                                                                                                                                                        |
| 48 |                      |                      |                                                                                                                                                                                                                                                                                        |
| 49 |                      |                      |                                                                                                                                                                                                                                                                                        |
| 50 |                      |                      |                                                                                                                                                                                                                                                                                        |
| 51 |                      |                      |                                                                                                                                                                                                                                                                                        |
| 52 |                      |                      |                                                                                                                                                                                                                                                                                        |
| 53 |                      |                      |                                                                                                                                                                                                                                                                                        |
| 54 |                      |                      |                                                                                                                                                                                                                                                                                        |
| 55 | Participants         | <a href="#">#13b</a> | Give reasons for non-participation at each stage 10-12                                                                                                                                                                                                                                 |
| 56 |                      |                      |                                                                                                                                                                                                                                                                                        |
| 57 | Participants         | <a href="#">#13c</a> | Consider use of a flow diagram n/a                                                                                                                                                                                                                                                     |
| 58 |                      |                      |                                                                                                                                                                                                                                                                                        |
| 59 |                      |                      |                                                                                                                                                                                                                                                                                        |
| 60 |                      |                      |                                                                                                                                                                                                                                                                                        |

|    |                    |                      |                                                                                                                                                                                                                   |                |
|----|--------------------|----------------------|-------------------------------------------------------------------------------------------------------------------------------------------------------------------------------------------------------------------|----------------|
| 1  | Descriptive data   | <a href="#">#14a</a> | Give characteristics of study participants (eg demographic, clinical, social) and information on exposures and potential confounders. Give information separately for exposed and unexposed groups if applicable. | 10 (table 2)   |
| 2  |                    |                      |                                                                                                                                                                                                                   |                |
| 3  |                    |                      |                                                                                                                                                                                                                   |                |
| 4  |                    |                      |                                                                                                                                                                                                                   |                |
| 5  |                    |                      |                                                                                                                                                                                                                   |                |
| 6  | Descriptive data   | <a href="#">#14b</a> | Indicate number of participants with missing data for each variable of interest                                                                                                                                   | 10             |
| 7  |                    |                      |                                                                                                                                                                                                                   |                |
| 8  |                    |                      |                                                                                                                                                                                                                   |                |
| 9  |                    |                      |                                                                                                                                                                                                                   |                |
| 10 | Outcome data       | <a href="#">#15</a>  | Report numbers of outcome events or summary measures. Give information separately for exposed and unexposed groups if applicable.                                                                                 | see tables 3-5 |
| 11 |                    |                      |                                                                                                                                                                                                                   |                |
| 12 |                    |                      |                                                                                                                                                                                                                   |                |
| 13 |                    |                      |                                                                                                                                                                                                                   |                |
| 14 |                    |                      |                                                                                                                                                                                                                   |                |
| 15 | Main results       | <a href="#">#16a</a> | Give unadjusted estimates and, if applicable, confounder-adjusted estimates and their precision (eg, 95% confidence interval). Make clear which confounders were adjusted for and why they were included          | 10-13          |
| 16 |                    |                      |                                                                                                                                                                                                                   |                |
| 17 |                    |                      |                                                                                                                                                                                                                   |                |
| 18 |                    |                      |                                                                                                                                                                                                                   |                |
| 19 |                    |                      |                                                                                                                                                                                                                   |                |
| 20 | Main results       | <a href="#">#16b</a> | Report category boundaries when continuous variables were categorized                                                                                                                                             | 6-10           |
| 21 |                    |                      |                                                                                                                                                                                                                   |                |
| 22 |                    |                      |                                                                                                                                                                                                                   |                |
| 23 | Main results       | <a href="#">#16c</a> | If relevant, consider translating estimates of relative risk into absolute risk for a meaningful time period                                                                                                      | n/a            |
| 24 |                    |                      |                                                                                                                                                                                                                   |                |
| 25 |                    |                      |                                                                                                                                                                                                                   |                |
| 26 |                    |                      |                                                                                                                                                                                                                   |                |
| 27 | Other analyses     | <a href="#">#17</a>  | Report other analyses done—e.g., analyses of subgroups and interactions, and sensitivity analyses                                                                                                                 | 6-10           |
| 28 |                    |                      |                                                                                                                                                                                                                   |                |
| 29 |                    |                      |                                                                                                                                                                                                                   |                |
| 30 |                    |                      |                                                                                                                                                                                                                   |                |
| 31 | <b>Discussion</b>  |                      |                                                                                                                                                                                                                   |                |
| 32 |                    |                      |                                                                                                                                                                                                                   |                |
| 33 | Key results        | <a href="#">#18</a>  | Summarise key results with reference to study objectives                                                                                                                                                          | 14-16          |
| 34 |                    |                      |                                                                                                                                                                                                                   |                |
| 35 | Limitations        | <a href="#">#19</a>  | Discuss limitations of the study, taking into account sources of potential bias or imprecision. Discuss both direction and magnitude of any potential bias.                                                       | 17             |
| 36 |                    |                      |                                                                                                                                                                                                                   |                |
| 37 |                    |                      |                                                                                                                                                                                                                   |                |
| 38 |                    |                      |                                                                                                                                                                                                                   |                |
| 39 |                    |                      |                                                                                                                                                                                                                   |                |
| 40 | Interpretation     | <a href="#">#20</a>  | Give a cautious overall interpretation considering objectives, limitations, multiplicity of analyses, results from similar studies, and other relevant evidence.                                                  | 17             |
| 41 |                    |                      |                                                                                                                                                                                                                   |                |
| 42 |                    |                      |                                                                                                                                                                                                                   |                |
| 43 |                    |                      |                                                                                                                                                                                                                   |                |
| 44 |                    |                      |                                                                                                                                                                                                                   |                |
| 45 | Generalisability   | <a href="#">#21</a>  | Discuss the generalisability (external validity) of the study results                                                                                                                                             | 17             |
| 46 |                    |                      |                                                                                                                                                                                                                   |                |
| 47 |                    |                      |                                                                                                                                                                                                                   |                |
| 48 | <b>Other</b>       |                      |                                                                                                                                                                                                                   |                |
| 49 | <b>Information</b> |                      |                                                                                                                                                                                                                   |                |
| 50 |                    |                      |                                                                                                                                                                                                                   |                |
| 51 |                    |                      |                                                                                                                                                                                                                   |                |
| 52 | Funding            | <a href="#">#22</a>  | Give the source of funding and the role of the funders for the present study and, if applicable, for the original study on which the present article is based                                                     | 17             |
| 53 |                    |                      |                                                                                                                                                                                                                   |                |
| 54 |                    |                      |                                                                                                                                                                                                                   |                |
| 55 |                    |                      |                                                                                                                                                                                                                   |                |
| 56 |                    |                      |                                                                                                                                                                                                                   |                |
| 57 | Notes:             |                      |                                                                                                                                                                                                                   |                |
| 58 |                    |                      |                                                                                                                                                                                                                   |                |
| 59 |                    |                      |                                                                                                                                                                                                                   |                |
| 60 |                    |                      |                                                                                                                                                                                                                   |                |

- 1 • 14a: 10 (table 2)
- 2
- 3 • 15: see tables 3-5 The STROBE checklist is distributed under the terms of the Creative Commons
- 4 Attribution License CC-BY. This checklist was completed on 02. June 2020 using
- 5 <https://www.goodreports.org/>, a tool made by the [EQUATOR Network](#) in collaboration with [Penelope.ai](#)
- 6
- 7
- 8
- 9
- 10
- 11
- 12
- 13
- 14
- 15
- 16
- 17
- 18
- 19
- 20
- 21
- 22
- 23
- 24
- 25
- 26
- 27
- 28
- 29
- 30
- 31
- 32
- 33
- 34
- 35
- 36
- 37
- 38
- 39
- 40
- 41
- 42
- 43
- 44
- 45
- 46
- 47
- 48
- 49
- 50
- 51
- 52
- 53
- 54
- 55
- 56
- 57
- 58
- 59
- 60

# BMJ Open

## The natural history of tinnitus in adults: a cross sectional and longitudinal analysis

|                                 |                                                                                                                                                                                                                                                                                                                                                                                                               |
|---------------------------------|---------------------------------------------------------------------------------------------------------------------------------------------------------------------------------------------------------------------------------------------------------------------------------------------------------------------------------------------------------------------------------------------------------------|
| Journal:                        | <i>BMJ Open</i>                                                                                                                                                                                                                                                                                                                                                                                               |
| Manuscript ID                   | bmjopen-2020-041290.R1                                                                                                                                                                                                                                                                                                                                                                                        |
| Article Type:                   | Original research                                                                                                                                                                                                                                                                                                                                                                                             |
| Date Submitted by the Author:   | 17-Oct-2020                                                                                                                                                                                                                                                                                                                                                                                                   |
| Complete List of Authors:       | Dawes, Piers; The University of Manchester, NIHR Manchester Biomedical Research Centre; Macquarie University, Department of Linguistics<br>Newall, John; Macquarie University, Linguistics<br>Stockdale, David ; British Tinnitus Association, Baguley, David; University of Nottingham, NIHR Nottingham Biomedical Research Centre; Nottingham University Hospitals NHS Trust, Nottingham Audiology Services |
| <b>Primary Subject Heading</b>: | Epidemiology                                                                                                                                                                                                                                                                                                                                                                                                  |
| Secondary Subject Heading:      | Epidemiology, Ear, nose and throat/otolaryngology                                                                                                                                                                                                                                                                                                                                                             |
| Keywords:                       | EPIDEMIOLOGY, Adult otolaryngology < OTOLARYNGOLOGY, Audiology < OTOLARYNGOLOGY                                                                                                                                                                                                                                                                                                                               |
|                                 |                                                                                                                                                                                                                                                                                                                                                                                                               |

SCHOLARONE™  
Manuscripts



I, the Submitting Author has the right to grant and does grant on behalf of all authors of the Work (as defined in the below author licence), an exclusive licence and/or a non-exclusive licence for contributions from authors who are: i) UK Crown employees; ii) where BMJ has agreed a CC-BY licence shall apply, and/or iii) in accordance with the terms applicable for US Federal Government officers or employees acting as part of their official duties; on a worldwide, perpetual, irrevocable, royalty-free basis to BMJ Publishing Group Ltd ("BMJ") its licensees and where the relevant Journal is co-owned by BMJ to the co-owners of the Journal, to publish the Work in this journal and any other BMJ products and to exploit all rights, as set out in our [licence](#).

The Submitting Author accepts and understands that any supply made under these terms is made by BMJ to the Submitting Author unless you are acting as an employee on behalf of your employer or a postgraduate student of an affiliated institution which is paying any applicable article publishing charge ("APC") for Open Access articles. Where the Submitting Author wishes to make the Work available on an Open Access basis (and intends to pay the relevant APC), the terms of reuse of such Open Access shall be governed by a Creative Commons licence – details of these licences and which [Creative Commons](#) licence will apply to this Work are set out in our licence referred to above.

Other than as permitted in any relevant BMJ Author's Self Archiving Policies, I confirm this Work has not been accepted for publication elsewhere, is not being considered for publication elsewhere and does not duplicate material already published. I confirm all authors consent to publication of this Work and authorise the granting of this licence.

## The natural history of tinnitus in adults: a cross sectional and longitudinal analysis

**Piers Dawes<sup>1,2</sup>**

**John Newall<sup>2</sup>**

**David Stockdale<sup>3</sup>**

**David M. Baguley<sup>4,5,6</sup>**

1. NIHR Manchester Biomedical Research Centre, University of Manchester, Manchester, UK
2. The Department of Linguistics, Macquarie University, Sydney, Australia
3. British Tinnitus Association, Sheffield UK
4. NIHR Nottingham Biomedical Research Centre, University of Nottingham, Nottingham, UK
5. Hearing Sciences, Division of Clinical Neurosciences, School of Medicine, University of Nottingham, Nottingham UK
6. Nottingham Audiology Services, Nottingham University NHS Trust, Nottingham UK

Word count: 4407

Address for correspondence:

Dr P Dawes, The Department of Linguistics, Macquarie University, Sydney, Australia  
piers.dawes@manchester.ac.uk



## Abstract

### Objective

To assess incidence and changes in tinnitus and bothersome tinnitus as well as associated risk factors in a large sample of UK adults.

### Design

Prospective cohort study

### Setting

United Kingdom

### Participants

For cross-sectional analysis, a group of 168,348 participants aged between 40 to 69 years with hearing and tinnitus data, from the UK Biobank resource. Longitudinal analysis included a subset of 4,746 people who attended a 4 year retest assessment.

### Main outcome measures

Presence and bothersomeness of tinnitus.

### Results

17.7% and 5.8% of participants reported tinnitus or bothersome tinnitus respectively. The 4 year incidence of tinnitus was 8.7%. Multivariate logistic regression models suggested that age, hearing difficulties, work noise exposure, ototoxic medication, and neuroticism were all positively associated with both tinnitus and bothersome tinnitus. Reduced odds of tinnitus, but not bothersome tinnitus was seen in alcohol drinkers versus non-drinkers. Male gender was associated with increased odds of tinnitus, whilst female gender was associated with increased odds of bothersome tinnitus. At follow up, of those originally reporting tinnitus, 18.3% reported no tinnitus. Of those still reporting tinnitus, 9% reported improvement, 9% reported tinnitus becoming more bothersome, with the rest unchanged. Male gender and alcohol consumption were associated with tinnitus being reported less bothersome, hearing difficulties were associated with the odds of tinnitus being reported as more bothersome.

## Conclusions

This study is one of the few to provide data on the natural history of tinnitus in a non-clinical population, suggesting that resolution is relatively uncommon, with improvement and worsening of symptoms equally likely. There was limited evidence for any modifiable lifestyle factors being associated with changes in tinnitus symptoms. In view of the largely persistent nature of tinnitus, public health strategies should focus on i) primary prevention and ii) managing symptoms in people that have tinnitus, and monitoring changes in bothersomeness.

## Keywords

Tinnitus, Biobank, natural history, incidence

## Article Summary

### Strengths and limitations of this study

- This study investigated both the prevalence and incidence of tinnitus and its correlates in a sample drawn from the UK Biobank resource.
- The study includes both a cross sectional analysis of a large sample (168,348 participants), with the longitudinal component based on a smaller sample (4,746 participants).
- The UK Biobank resource, from which the data was drawn, is not completely representative of the UK population.
- A wide range of relevant risk factors were available for the analysis.
- Lack of a consensus on the definition of tinnitus hampers comparison across the literature.

## Introduction

Tinnitus (the subjective experience of sound perception when there is no external source) can be a troublesome experience, and when severe can be associated with insomnia, poor concentration, anxiety, and/or depression.(1) Around 10-15% of adults have tinnitus, and although cost effective, the cost of care of patients with tinnitus is high.(2) The question of the natural history of tinnitus in adults is of major importance for both patients and clinicians (3) but data regarding the natural history of tinnitus in adults are scant. A few studies have investigated tinnitus in various populations longitudinally (Table 1). Estimates of the incidence of tinnitus vary depending on the age of the population and the definition of tinnitus in each study. Such studies are useful in demand forecasting for diagnostic and therapy services, but do not support the counselling of existing tinnitus cases regarding their prognosis. The main limitation of many studies examining changes in tinnitus over time is that they were conducted with specific populations, clinical samples, or with people taking part in tinnitus research, and so may not be representative of the general population.

Clifford et al. (4) reported on the progression of tinnitus in a US Marine cohort, indicating that worsening tinnitus was associated with the presence of Post-Traumatic Stress Disorder, and moderate/severe Traumatic Brain Injury (TBI). One other study reported a modest improvement in the bothersomeness of tinnitus at follow up 4.9 years after treatment by a Clinical Psychologist, the majority (59%) having received cognitive behaviour therapy for tinnitus.(3) Another study reported that severity of symptoms tended to be more severe, with tinnitus of longer duration among patients presenting for tinnitus therapy.(5) A systematic review and meta-analysis reporting the experiences of patients with tinnitus who were research participants enrolled in control (waiting list) arms of clinical trials reported a small, statistically significant improvement in tinnitus symptoms over time, though clinical significance of these improvements was unclear.(6) Placebo groups in controlled clinical trials of tinnitus treatments have also reported reduced bothersomeness of tinnitus immediately and up to 14 weeks post placebo treatment.(7-9) In a conference report Smith and Coles(10) reported data regarding tinnitus from the UK National Study of Hearing.(11) Participants reporting tinnitus experiences were asked to retrospectively rate their tinnitus loudness and annoyance at two stages of their tinnitus experience: 'onset to middle' and 'middle/recent or end'. These ill-defined sample points render the data in this report are

hard to interpret, but it appears that in a small number (8.5%) the tinnitus had resolved completely, and that there was a general trend over time towards decreased annoyance.

Large scale data regarding longitudinal experiences of a general population regarding tinnitus has not been reported to date, with the closest examples examining samples an order of magnitude smaller than the present study.(12, 13) The only large scale population data available utilised indirect measures of tinnitus based on clinical record or health claim data. (14, 15) In the present study the aim was to establish the proportions of people who experience tinnitus and bothersome tinnitus, and changes in tinnitus and bothersome tinnitus over time and to determine demographic, health and lifestyle correlates, in order to inform patient counselling and identify potential avenues for prevention and treatment of tinnitus.

**Table 1. Prevalence and/or incidence rates of tinnitus**

| Study                      | Definition of tinnitus                                                                                                                 | Population                                                                                               | Prevalence of tinnitus at baseline | Follow-up interval; Incident tinnitus;                                                          |
|----------------------------|----------------------------------------------------------------------------------------------------------------------------------------|----------------------------------------------------------------------------------------------------------|------------------------------------|-------------------------------------------------------------------------------------------------|
| Gopinath, McMahon (13)     | Tinnitus over the past year lasting 5 minutes or longer                                                                                | Australia<br>Age: >=55 years<br>Baseline (n=2006)<br>Follow-up (n=1292, female=58.9%)                    | 37% (481)*                         | <b>5 year follow-up;</b><br>Persisting: 82% (346)<br>Resolved: 18% (78)<br>Incidence: 18% (156) |
| Nondahl, Cruickshanks (12) | Tinnitus over the past year of i) at least moderate severity or causing difficulty with sleep<br>ii) mild tinnitus not affecting sleep | United States<br>Age: 48-92 years<br>Baseline (n=3753, female=57.7%)<br>Follow-up (n=2800, female=58.6%) | 8.2% (moderate tinnitus) (308)     | <b>5 year follow-up;</b><br>Incidence of significant tinnitus: 5.7% (143)                       |
|                            |                                                                                                                                        |                                                                                                          | 20.2% (mild tinnitus) (754)        | <b>5 year follow-up;</b><br>Persisting : 68.6% (394)<br>Resolved : 31.4% (180)                  |
| Nondahl, Cruickshanks (16) | Tinnitus over the past year of at least moderate severity or causing difficulty with sleep                                             | United States<br>Age: 48-92 years<br>Follow-up (n=2922, female:59.3%)                                    | N.A.                               | <b>10 year follow-up;</b> 12.7% (371)                                                           |

|                                                                                              |                            |                                                                                                                                                                                                                                                                |                                                                                |                                     |                                                                                                                                                |
|----------------------------------------------------------------------------------------------|----------------------------|----------------------------------------------------------------------------------------------------------------------------------------------------------------------------------------------------------------------------------------------------------------|--------------------------------------------------------------------------------|-------------------------------------|------------------------------------------------------------------------------------------------------------------------------------------------|
| 1<br>2<br>3<br>4<br>5<br>6<br>7<br>8<br>9                                                    | Lee, Do Han (14)           | Based on record of health service utilisation for 'tinnitus' through the Korean National Health Insurance Service                                                                                                                                              | South Korea<br>Age: all ages<br>Follow-up (n=51 million, female= not reported) | 12.58-14.62 per 1000 from 2006-2015 | <b>Yearly incidence;</b><br>8.26-9.49 per 1000 from 2006-2015<br>9.1% 10 year incidence                                                        |
| 10<br>11<br>12<br>13<br>14<br>15<br>16<br>17<br>18<br>19<br>20<br>21<br>22<br>23<br>24<br>25 | Martinez, Wallenhorst (15) | Any tinnitus: based on health service utilisation for 'tinnitus' gathered through the United Kingdom Clinical Practice Research Datalink<br>Significant tinnitus: as above but with related follow up within 28 days.<br>See Martinez for full definition (15) | United Kingdom<br>Age: <=85 years<br>Follow-up (n=4.7 million, female= 50.5%)  | N.A.                                | <b>10 year follow-up;</b><br>Incidence significant tinnitus 5.4 per 10,000 person years<br>Incidence any tinnitus 47.3 per 10,000 person years |

## Methods

### Participants

Participants were drawn from the UK Biobank, an international resource for studying the genetic, environmental and lifestyle causes of diseases of middle and older age.(17)

Participant recruitment was conducted via the UK National Health Service and aimed to be as inclusive as possible of the UK population. In total, 9.2 million invitations were sent to recruit 503,325 participants who were aged between 40 to 69 years between 2006 to 2010, a response rate of 5.47%. The UK Biobank sample contains a higher proportion of females, people reporting White British ethnic background and people living in less deprived areas than the general population.(18) The UK Biobank sample is not representative of the UK general population, but the disease-exposure relationships are thought to generalizable due to the size and inclusiveness of the sample. Hearing and tinnitus measures were included part way through data collection, so information on tinnitus at baseline was available for 168,348 participants.

Participants attended an assessment centre where data on demographic, health, environmental and lifestyle factors were collected via computerised questionnaire along with physical measures including hearing testing during assessments of around 90 minutes in duration. Further information on procedures and the data collected is contained on the

1  
2  
3 UK Biobank website (<http://www.ukbiobank.ac.uk/>). During 2012 and 2013, 17,819  
4 participants attended a retest assessment, with a 21% response rate. All baseline measures  
5 were repeated, including hearing and tinnitus. The mean retest interval was 4.3 years (range  
6 2 to 7 years); retest tinnitus data were available for 4,746 participants. (For further details of  
7 the repeat assessment, see  
8 [http://biobank.ctsu.ox.ac.uk/~bbdatan/Repeat\\_assessment\\_doc\\_v1.0.pdf](http://biobank.ctsu.ox.ac.uk/~bbdatan/Repeat_assessment_doc_v1.0.pdf)). UK Biobank  
9 received ethical approval from the North West-Haydock National Research Ethics  
10 Committee (Ref 11/NW/0382), and all participants provided written informed consent.  
11  
12

13  
14  
15  
16  
17  
18  
19  
20 Information on sex and ethnicity (based on 2001 UK Census categories) and area of  
21 residence was collected. Area of residence was used to determine a Townsend deprivation  
22 score. The Townsend deprivation score is a proxy for socioeconomic status, and is applicable  
23 across the countries of the UK.(19) Townsend scores are based on four variables;  
24 unemployment, non-car ownership, non-home ownership and household overcrowding.  
25 Each variable is normalised relative to national levels and summed to provide an overall  
26 deprivation index. Higher scores represent more deprived (less affluent) socioeconomic  
27 status. A score of 0 represents the national mean with a standard deviation of 1. Townsend  
28 scores for areas of residence ranged between 14.01 and -5.59 in the 2011 census.(20) In the  
29 regression analyses below, Townsend scores were grouped from least to most deprived  
30 quartiles in the study sample.  
31  
32  
33  
34  
35  
36  
37  
38  
39  
40

#### 41 *Tinnitus*

42  
43 Participants were asked "Do you get or have you had noises (such as ringing or buzzing) in  
44 your head, or in one or both ears, that lasts for more than five minutes at a time?". In this  
45 analysis, tinnitus was identified based on responses of 'yes most of the time', 'yes a lot of  
46 the time' or 'yes some of the time', similar to criteria used in other studies of the  
47 epidemiology of tinnitus (21-23). If a participant reported that they did experience tinnitus  
48 that lasted for more than five minutes at a time, they were asked "How much do these  
49 noises worry, annoy or upset you when they are at their worst?"; severely, moderately,  
50 slightly or not at all. In this analysis, 'bothersome' tinnitus was identified on the basis of  
51 responses of either 'moderately' or 'severely'.  
52  
53  
54  
55  
56  
57  
58  
59  
60

1  
2  
3 Incident tinnitus was identified if a person who did not report tinnitus at baseline reported  
4 tinnitus at least some of the time at retest. Among those who reported tinnitus at baseline,  
5 'Worse tinnitus' was identified if someone reported their tinnitus as not being bothersome  
6 at baseline (i.e. 'slightly' or 'not at all') but reported their tinnitus being bothersome at  
7 follow up (i.e. 'moderately' or 'severely').  
8  
9  
10  
11  
12

### 13 14 *Hearing*

15  
16 Participants completed an English version of the Digit Triplet Test (DTT), a test of speech  
17 recognition in noise developed for large scale hearing screening.(24, 25) The DTT correlates  
18 strongly with audiometric thresholds. The DDT is described elsewhere  
19 (<http://biobank.ctsu.ox.ac.uk/crystal/label.cgi?id=100049>). In short, fifteen sets of three  
20 monosyllabic digits (e.g. 6-1-3) were presented over circumaural headphones with the  
21 volume of presentation set to a comfortable level. Digits were presented in background  
22 noise shaped to match the spectrum of the spoken digits. Noise levels varied adaptively to  
23 track a SNR for the 50% speech recognition threshold (SRT), which was based on the mean  
24 SNR for the last eight triplets. Lower (more negative scores) indicate better performance.  
25 Hearing was additionally indexed by self-reported hearing status with the question "Do you  
26 have any difficulty with your hearing?"  
27  
28  
29  
30  
31  
32  
33  
34  
35  
36  
37

### 38 *Occupation- and music-related noise exposure, ototoxic medication, metabolic syndrome,* 39 *physical activity, smoking, alcohol consumption and hearing aid use*

40  
41 The potential associations between tinnitus and risk factors were explored using a  
42 previously identified list and discussion between the authors.(1) Occupational and music-  
43 related noise exposure was identified on the basis of any reported exposure in response to  
44 the questions "Have you ever worked in a noisy place where you had to shout to be heard?"  
45 and "Have you ever listened to music for more than 3 hours per week at a volume which you  
46 would need to shout to be heard or, if wearing headphones, someone else would need to  
47 shout for you to hear them?". The criterion for work- and music-related noise corresponds  
48 to exposure estimated to exceed 85 dB(A) (26). Use of ototoxic medication was identified on  
49 the basis of reported regular (daily, weekly or monthly) use of medications known to have  
50 ototoxic properties (including loop diuretics, aminoglycoside antibiotics, quinine derivatives,  
51 non-steroidal anti-inflammatories and salicylates). Metabolic syndrome was identified based  
52  
53  
54  
55  
56  
57  
58  
59  
60

1  
2  
3 on the Adult Treatment Panel III report of the National Cholesterol Education Program (ATP  
4 III NCEP) criteria;(27) positive risk was identified on the basis of three or more of waist  
5 circumference of  $\geq 102$  cm in men and  $\geq 88$  cm in women; participant report of high  
6 cholesterol or if the participant reported they were currently taking medication for high  
7 cholesterol; measured systolic blood pressure greater than 130 mm Hg or diastolic pressure  
8 greater than 85 mm Hg; participant report of diabetes or the use of medication for diabetes.  
9 Participants were identified as being physically 'active' if they reported doing more than 10  
10 minutes of physical activity in relation to the question "Yesterday, about how long did you  
11 spend doing activities that needed moderate effort, making you somewhat short of breath?  
12 For example walking upstairs, going to the gym, jogging, energetic dancing, aerobics, most  
13 sports, using heavy power tools and other physically demanding DIY & gardening." 'Inactive'  
14 participant were identified on the basis of physical activity of 10 minutes or less. Current or  
15 previous tobacco smoking was identified on the basis of positive responses to two  
16 questions; "Do you smoke tobacco now?" and "In the past, how often have you smoked  
17 tobacco?" Alcohol drinkers were identified on the basis of any report of current alcohol  
18 consumption ("About how often do you drink alcohol?"; 'Special occasions only', 'One to  
19 three times a month', 'One or twice a week', 'Three or four times a week' or 'Daily or almost  
20 daily'). Non-drinkers were categorised based on a response of 'Never'. Hearing aid use was  
21 identified on the basis of a 'yes' response to "Do you use a hearing aid most of the time?".  
22  
23  
24  
25  
26  
27  
28  
29  
30  
31  
32  
33  
34  
35  
36  
37  
38  
39

#### 40 *Neuroticism*

41 Neuroticism scores were based on summed positive responses to 12 items from the Eysenck  
42 Personality Questionnaire Revised (EPQ-R),(28) including Does your mood often go up and  
43 down?; Do you ever feel 'just miserable' for no reason?; Are you an irritable person?; Are  
44 your feelings easily hurt?; Do you often feel 'fed-up'?; Would you call yourself a nervous  
45 person?; Are you a worrier?; Would you call yourself tense or 'highly strung'?; Do you worry  
46 too long after an embarrassing experience?; Do you suffer from 'nerves'?; Do you often feel  
47 lonely?; Are you often troubled by feelings of guilt?. Scores are summed to provide an  
48 integer score between 1 and 12 representing the number of neurotic traits present, with  
49 higher scores indicating greater neuroticism.  
50  
51  
52  
53  
54  
55  
56  
57  
58  
59  
60

#### *Data Analysis*



1  
2  
3 Cross tabulations performed to describe characteristics of those who reported tinnitus  
4 versus no tinnitus, and the subset of people with tinnitus who reported 'bothersome'  
5 tinnitus. Demographic, health, lifestyle and psychological characteristics were selected on  
6 the basis of previously being linked to tinnitus.(22, 29, 30) There were missing data for some  
7 measures primarily due to measures being added to the study protocol at different time  
8 points during data collection (see Table 2). Because the reason for the missing data was not  
9 systematically related to the outcomes of interest in this study, it was assumed that the data  
10 were missing completely at random. Missing variable analysis did not identify any pattern to  
11 the missing data. Multinomial logistic regression was used to model cross-sectional baseline  
12 associations between demographic, hearing, noise exposure, health and lifestyle factors and  
13 tinnitus (versus no tinnitus) and bothersome tinnitus (versus non-bothersome tinnitus). A  
14 Cox proportional hazard model was used to model the incidence of tinnitus and more  
15 bothersome tinnitus at 4 year follow-up. All the statistical assumptions for performing the  
16 Cox proportional hazard model were met. Analyses were performed with IBM SPSS version  
17 23.(31)  
18  
19  
20  
21  
22  
23  
24  
25  
26  
27  
28  
29  
30  
31

### 32 *Patient and public involvement*

34 Patient and public involvement is reported according to the Guidance for Reporting  
35 Involvement of Patients and the Public (GRIPP) – short form 17. 1. Aim: UK Biobank  
36 consulted with stakeholders including the public at several times during the planning stages  
37 and post implementation to obtain guidance and feedback in relation to; consent,  
38 confidentiality, access, commercialisation, and oversight/monitoring. The conception of the  
39 project and its aim sprung directly from public enquiries fielded by the British Tinnitus  
40 Association a partner in this project. 2. Methods: For the UK Biobank, a key element in the  
41 public consultation process was an initial workshop which included 20 members of the  
42 public in the study target age range and 10 outside the target age range. Sessions key points  
43 were noted, and sessions tape recorded, a post workshop questionnaire was sent to all  
44 attendees, and to any stakeholders who were not able to attend the workshops in person  
45 (to increase representativeness). 3. Results: Public opinion across many areas addressed in  
46 the aims was diverse, a full report can be found at <http://www.ukbiobank.ac.uk/public-consultation/> 4. Discussion: Public input influenced ethical considerations, access to data,  
47 the consent process, the commercialisation of the resource, and oversight/monitoring. 5.  
48  
49  
50  
51  
52  
53  
54  
55  
56  
57  
58  
59  
60

Reflections/critical perspective: Public and other stakeholder input into the study was essential to ensure public confidence in the study conduct, and to respond to public concerns with the resource. Whilst efforts were taken to consider public input, the diversity of opinion meant that not all perspectives were equally influential on the UK Biobank's design and conduct.

## Results

### *Cross-sectional analysis*

In this sample of adults aged 40 to 69 years, 17.7% (n = 29,861) reported tinnitus and 5.8% (n = 9,751) reported bothersome tinnitus. Table 2 summarises the characteristics of participants who reported that they experienced tinnitus versus those who did not report tinnitus. Characteristics of those who reported tinnitus are broken down further with respect to whether participants reported their tinnitus as being bothersome or not bothersome.

**Table 2. Sample characteristics**

|                                            | No tinnitus     | Tinnitus                                         |                   |                 |
|--------------------------------------------|-----------------|--------------------------------------------------|-------------------|-----------------|
|                                            |                 | Any tinnitus<br>(Not bothersome +<br>Bothersome) | Not<br>bothersome | Bothersome      |
|                                            | N = 138,487     | N = 29,861                                       | N = 20,110        | N = 9,751       |
| Age (168,348)*                             | 56.4 (SD 8.2)   | 58.7 (SD 7.58)                                   | 57.5 (SD 8.22)    | 58.0 (SD 7.78)  |
| Sex (male; 168,348)                        | 44.0%           | 52.80%                                           | 51.0%             | 45.70%          |
| Social economic status score*<br>(168,079) | -1.12 (SD 2.92) | -0.99 (SD 3.01)                                  | -1.02 (SD 3.00)   | -0.66 (SD 3.16) |
| SRT better ear (157,574)                   | -7.43 (SD 1.62) | -7.07 (SD 1.96)                                  | -7.26 (SD 1.80)   | -6.91 (SD 2.13) |
| Hearing difficulties (168,348)             | 21.3%           | 56.4%                                            | 43.4%             | 63.3%           |
| Work noise exposure (166,805)              | 20.5%           | 34.4%                                            | 32.2%             | 37.0%           |
| Music noise exposure (165,977)             | 11.5%           | 16.6%                                            | 17.4%             | 18.5%           |
| Physical activity (106,989)                | 71.1%           | 71.7%                                            | 71.5%             | 69.3%           |
| Ototoxic medication (168,348)              | 39.2%           | 46.5%                                            | 44.6%             | 53.1%           |
| Alcohol drinker (168,201)                  | 91.5%           | 90.1%                                            | 91.2%             | 88.1%           |
| Current or previous smoking (167,725)      | 43.9%           | 48.5%                                            | 47.4%             | 50.7%           |
| Metabolic risk (168,348)                   | 9.1%            | 12.0%                                            | 10.7%             | 13.3%           |
| Neuroticism score (136,600)                | 3.98 (SD 3.22)  | 4.63 (SD 3.41)                                   | 4.44 (SD 3.33)    | 5.64 (SD 3.47)  |

\*The number in brackets indicates the number of participants that completed each measure.

+Social economic status indexed by Townsend deprivation index score; lower (more negative) score indicate less deprived (more affluent) status

All variables were entered simultaneously into multi-variable logistic regression model for tinnitus versus no tinnitus (of the original sample of 168,348, after excluding all participant with missing data 80,380 participants were included in the analysis). A multi-variable logistic regression model was also conducted to compare bothersome tinnitus versus not bothersome tinnitus (of the original sample of 29,861 tinnitus sufferers after excluding all participants with missing data, 21,690 were included in the analysis)(Table 3). Similar patterns of association were observed for tinnitus and bothersome tinnitus. The Nagelkerke  $r^2$  was 0.143 for tinnitus and 0.067 for bothersome tinnitus. Older age, male sex, poorer speech recognition threshold, hearing difficulties, work noise exposure, music noise exposure, physical activity, regular use of ototoxic medication, and neuroticism were associated with tinnitus. Alcohol consumption was associated with lower odds of tinnitus. Female sex, most deprived social economic status, poorer speech recognition threshold, hearing difficulties, work noise exposure, ototoxic medication and neuroticism were associated with bothersome tinnitus. The sample included 1013 hearing aid users. The analyses were re-run to check for interactions with hearing difficulties and hearing aid use on tinnitus and bothersome tinnitus. There was no significant hearing aid by hearing difficulties interaction for tinnitus (OR 0.50 95% confidence interval 0.21 – 1.21,  $p = 0.125$ ) or bothersome tinnitus (OR 0.87 95% confidence interval 0.18 – 4.18,  $p = 0.888$ ).

**Table 3. Cross-sectional correlates of tinnitus and bothersome tinnitus**

|                                 | Tinnitus<br>N=80,380<br>$\chi^2(15) = 7110.23, p < 0.001$ |             |             |              | Bothersome tinnitus<br>N=21,690<br>$\chi^2(15) = 912.89, p < 0.001$ |             |             |              |
|---------------------------------|-----------------------------------------------------------|-------------|-------------|--------------|---------------------------------------------------------------------|-------------|-------------|--------------|
|                                 | 95% C.I. for EXP(B)                                       |             |             |              | 95% C.I. for EXP(B)                                                 |             |             |              |
|                                 | Exp(B)                                                    | Lower       | Upper       | p            | Exp(B)                                                              | Lower       | Upper       | p            |
| Age                             | <b>1.03</b>                                               | <b>1.03</b> | <b>1.03</b> | <b>0.000</b> | 1.00                                                                | 1.00        | 1.01        | 0.176        |
| Sex (male)                      | <b>1.20</b>                                               | <b>1.15</b> | <b>1.25</b> | <b>0.000</b> | <b>0.74</b>                                                         | <b>0.68</b> | <b>0.80</b> | <b>0.000</b> |
| Social economic status          |                                                           |             |             | 0.294        |                                                                     |             |             | 0.023        |
| First Quartile 1 (Reference)    |                                                           |             |             | -            |                                                                     |             |             | -            |
| Second Quartile                 | 1.02                                                      | 0.97        | 1.08        | 0.484        | 0.95                                                                | 0.86        | 1.05        | 0.297        |
| Third Quartile                  | 0.98                                                      | 0.93        | 1.04        | 0.480        | 1.03                                                                | 0.93        | 1.14        | 0.587        |
| Fourth Quartile (most deprived) | 1.03                                                      | 0.98        | 1.09        | 0.262        | <b>1.11</b>                                                         | <b>1.00</b> | <b>1.23</b> | <b>0.043</b> |

|                                   |             |             |             |              |             |             |             |              |
|-----------------------------------|-------------|-------------|-------------|--------------|-------------|-------------|-------------|--------------|
| SRT better ear                    | <b>1.03</b> | <b>1.02</b> | <b>1.04</b> | <b>0.000</b> | <b>1.02</b> | <b>1.00</b> | <b>1.05</b> | <b>0.020</b> |
| Hearing difficulties (yes)        | <b>3.75</b> | <b>3.60</b> | <b>3.90</b> | <b>0.000</b> | <b>2.07</b> | <b>1.92</b> | <b>2.23</b> | <b>0.000</b> |
| Work noise exposure (yes)         | <b>1.40</b> | <b>1.34</b> | <b>1.47</b> | <b>0.000</b> | <b>1.15</b> | <b>1.06</b> | <b>1.25</b> | <b>0.001</b> |
| Music noise exposure (yes)        | <b>1.39</b> | <b>1.31</b> | <b>1.47</b> | <b>0.000</b> | 1.03        | 0.93        | 1.13        | 0.576        |
| Physical activity (yes)           | <b>1.05</b> | <b>1.00</b> | <b>1.09</b> | <b>0.038</b> | 0.97        | 0.89        | 1.04        | 0.372        |
| Ototoxic medication (yes)         | <b>1.18</b> | <b>1.13</b> | <b>1.23</b> | <b>0.000</b> | <b>1.19</b> | <b>1.11</b> | <b>1.28</b> | <b>0.000</b> |
| Alcohol drinker (yes)             | <b>0.87</b> | <b>0.80</b> | <b>0.93</b> | <b>0.000</b> | 0.89        | 0.78        | 1.01        | 0.070        |
| Current or previous smoking (yes) | 0.99        | 0.95        | 1.03        | 0.500        | 1.04        | 0.97        | 1.12        | 0.300        |
| Metabolic risk (yes)              | 1.05        | 0.98        | 1.12        | 0.210        | 0.97        | 0.86        | 1.09        | 0.601        |
| Neuroticism score                 | <b>1.05</b> | <b>1.04</b> | <b>1.06</b> | <b>0.000</b> | <b>1.10</b> | <b>1.08</b> | <b>1.11</b> | <b>0.000</b> |

### *Longitudinal analysis*

A subset of participants (3997 people) who had completed the questions about tinnitus and the full set of correlates of interest were included in the longitudinal analysis, with a mean retest interval of 4.3 years (2-7 years range). There were 276 cases of incident tinnitus among the 3,177 people who did not report tinnitus at baseline; a 4 year incidence of 8.7%. The Cox proportional hazard model for incident tinnitus between baseline and 4 year follow-up was not statistically significant ( $\chi^2(15) = 21.6, p = 0.119$ ). Among the 820 people who reported tinnitus at baseline and completed responses at follow-up, 150 reported no tinnitus at follow-up (including 63 who claimed never to have had tinnitus); 18.3% of people reporting tinnitus at baseline did not report tinnitus at follow-up. Of the 820 tinnitus sufferers completing follow up, after excluding cases of missing data 565 were included in the Cox proportional hazard model. The analysis suggests that only hearing difficulties were associated with reduced likelihood of no tinnitus at follow-up (Table 4).

**Table 4. Cox proportional hazard model for no tinnitus at follow-up (i.e. resolved tinnitus)**

---

Resolved tinnitus

---

| N=565<br>( $\chi^2(15) = 26.7, p = 0.031$ ) |             |             |             |              |
|---------------------------------------------|-------------|-------------|-------------|--------------|
| 95% confidence interval                     |             |             |             |              |
|                                             | $\beta$     | Lower       | Upper       | <i>p</i>     |
| Age                                         | 0.99        | 0.96        | 1.03        | 0.683        |
| Sex (male)                                  | 0.96        | 0.62        | 1.47        | 0.841        |
| Social economic status                      |             |             |             | 0.558        |
| First Quartile 1 (Reference)                |             |             |             | -            |
| Second Quartile                             | 1.11        | 0.69        | 1.80        | 0.671        |
| Third Quartile                              | 0.72        | 0.39        | 1.30        | 0.273        |
| Fourth Quartile (most deprived)             | 1.01        | 0.55        | 1.85        | 0.972        |
| SRT better ear                              | 0.98        | 0.88        | 1.10        | 0.735        |
| Hearing difficulties (yes)                  | <b>0.48</b> | <b>0.32</b> | <b>0.74</b> | <b>0.001</b> |
| Work noise exposure (yes)                   | 1.47        | 0.95        | 2.26        | 0.080        |
| Music noise exposure (yes)                  | 1.26        | 0.76        | 2.09        | 0.379        |
| Physical activity (yes)                     | 1.48        | 0.84        | 2.58        | 0.173        |
| Ototoxic medication (yes)                   | 0.83        | 0.55        | 1.25        | 0.383        |
| Alcohol drinker (yes)                       | 0.66        | 0.30        | 1.47        | 0.309        |
| Current or previous smoking (yes)           | 1.19        | 0.79        | 1.78        | 0.399        |
| Metabolic risk (yes)                        | 0.66        | 0.35        | 1.25        | 0.203        |
| Neuroticism score                           | 1.05        | 0.99        | 1.12        | 0.101        |

Among the 1,039 people who completed questions about tinnitus annoyance at baseline and follow-up, 850 (81.8%) reported no change, 93 (9%) reported that their tinnitus was more bothersome and 93 (9%) reported their tinnitus being less bothersome.

In a Cox proportional hazard model, of those who completed follow up and who reported “not at all” or “slightly” bothersome tinnitus at baseline cases of tinnitus being reported as being more bothersome (versus those reporting no change) were associated with higher (poorer) better ear SRT, non-drinking and female gender (Table 5). The sample included 27 hearing aid users, and the model was re-run to check for an interaction with hearing aid use and speech reception threshold. The interaction was not statistically significant (OR 0.88, 95% confidence interval 0.67 – 1.14,  $p = 0.337$ ). The model for reduced bothersomeness was not statistically significant  $\chi^2(15) = 24.1, p = 0.063$ .

**Table 5. Cox proportional hazard model for tinnitus bothersomeness worse**

| Bothersomeness worse<br>N=404<br>$\chi^2(15) = 34.4, p = 0.003$ |  |
|-----------------------------------------------------------------|--|
|-----------------------------------------------------------------|--|

|                                   | $\beta$     | 95% confidence interval |             | <i>p</i>     |
|-----------------------------------|-------------|-------------------------|-------------|--------------|
|                                   |             | Lower                   | Upper       |              |
| Age                               | 0.98        | 0.93                    | 1.04        | 0.481        |
| Sex (male)                        | <b>0.44</b> | <b>0.22</b>             | <b>0.86</b> | <b>0.017</b> |
| Social economic status            |             |                         |             | 0.258        |
| First Quartile 1 (Reference)      |             |                         |             | -            |
| Second Quartile                   | 1.66        | 0.80                    | 3.48        | 0.176        |
| Third Quartile                    | 0.77        | 0.27                    | 2.23        | 0.633        |
| Fourth Quartile (most deprived)   | 0.77        | 0.27                    | 2.19        | 0.621        |
| SRT better ear                    | <b>1.13</b> | <b>1.02</b>             | <b>1.27</b> | <b>0.026</b> |
| Hearing difficulties (yes)        | 2.01        | 0.96                    | 4.20        | 0.063        |
| Work noise exposure (yes)         | 1.41        | 0.71                    | 2.83        | 0.329        |
| Music noise exposure (yes)        | 1.15        | 0.50                    | 2.63        | 0.738        |
| Physical activity (yes)           | 0.88        | 0.39                    | 1.96        | 0.752        |
| Ototoxic medication (yes)         | 1.24        | 0.65                    | 2.34        | 0.513        |
| Alcohol drinker (yes)             | <b>0.30</b> | <b>0.11</b>             | <b>0.87</b> | <b>0.026</b> |
| Current or previous smoking (yes) | 1.61        | 0.83                    | 3.11        | 0.156        |
| Metabolic risk (yes)              | 0.67        | 0.22                    | 2.04        | 0.485        |
| Neuroticism score                 | 0.95        | 0.86                    | 1.06        | 0.381        |

## Discussion

In cross-sectional analysis, 17.7% of adults 40-69 years old reported tinnitus, with 5.8% reporting that tinnitus was bothersome. The 4 year incidence of tinnitus in this sample was 8.7%. The study offered some cause for optimism with respect to the natural history of tinnitus; around 18% of people who reported tinnitus at baseline did not report tinnitus at follow-up, an average of 4 years later. For those that continued to experience tinnitus, 81.8% reported that tinnitus bothersomeness was unchanged after 4 years, 9% reported tinnitus became worse (previously not bothersome, now bothersome), and in 9% better (previously bothersome, now not). The strengths of the study include the large inclusive sample, which was not derived from a specific tinnitus nor hearing study. The availability of longitudinal data was a significant strength. Longitudinal tinnitus data are available in a very small number of other studies. The use of standard tinnitus phenotype questions allowed comparison of these results with those of other studies. Although accounted for in the model, the variability in time elapsed at retest (2-7 years) may be a limitation. However the minimum of 2 years is longer than the period of most intervention studies and provides time

1  
2  
3 to observe natural variation in tinnitus. In terms of patient counselling about long term  
4 prognoses for tinnitus, the 4 year mean follow up period limits the certainty of any opinion  
5 in relation to longer-term outcomes. One significant limitation of the study is the possibility  
6 that a person may have received clinical help for tinnitus during the intervening years. Most  
7 people seek help within the first year of onset,(32) so this is unlikely to have been the case  
8 for a large proportion of participants here. Unfortunately, information about receiving  
9 clinical help and the duration of tinnitus was not available in this study and this limits our  
10 confidence in stating that all cases of spontaneous recovery, were indeed spontaneous.  
11  
12  
13  
14  
15  
16  
17  
18  
19

### 20 *Tinnitus correlates*

21 Poorer hearing (better ear SRT and self-reported hearing difficulties) was associated with  
22 the presence of tinnitus and bothersome tinnitus. Hearing difficulties were associated with  
23 lower likelihood of resolved tinnitus and SRT with lower likelihood of tinnitus being less  
24 bothersome over time. But there was no relationship between SRT or hearing difficulties  
25 and incident tinnitus. A relationship between tinnitus and hearing loss is consistently  
26 reported (22, 33-36) with hearing loss being proposed as a trigger for tinnitus which then  
27 persists due to maladaptive plasticity in the central auditory and associated systems.(37)  
28 The lack of a relationship between hearing and incident tinnitus may be due to the much  
29 smaller sample for the longitudinal analysis versus the cross-sectional analysis. Work noise  
30 exposure was associated with prevalent tinnitus and bothersome tinnitus. Music exposure  
31 was associated with prevalent tinnitus. Noise exposure is the primary modifiable risk factor  
32 for tinnitus (34, 38, 39) and the pathophysiological impact can be either cochlear hair cell  
33 dysfunction, leading to a subjective hearing loss, and/or cochlear synaptopathy, the effects  
34 of which are more subtle.(40)  
35  
36  
37  
38  
39  
40  
41  
42  
43  
44  
45  
46  
47  
48

49 Alcohol consumption was associated with reduced odds of tinnitus, but not of bothersome  
50 tinnitus. Moderate alcohol consumption has been suggested to have a protective effect on  
51 hearing, perhaps via cardiovascular pathways.(41, 42) Other studies reported no association  
52 between alcohol consumption and tinnitus,(43, 44) with one study reporting increased risk  
53 of tinnitus with alcohol consumption.(42) There are several difficulties with disentangling  
54 the effect of alcohol consumption on tinnitus. First, alcohol consumption is highly  
55 confounded with socio-cultural factors that may also impact on health, including  
56  
57  
58  
59  
60



1  
2  
3 hearing.(45) Second, impacts of alcohol consumption may be dose-dependent; heavy  
4 alcohol consumption is certainly bad for general health, including hearing.(46) Impacts may  
5 be different for moderate or light levels of consumption.(46-48) Third, comparing health  
6 outcomes in drinkers versus non-drinkers may give the false impression that alcohol  
7 consumptions is linked to better health outcomes due to the inclusion of people who have  
8 given up drinking due to poor health in the non-drinker group ('sick-quitters').(41, 49) The  
9 detailed level of analysis in relation to these questions is beyond the scope of the present  
10 paper, and should be the subject of future investigation.  
11  
12  
13  
14  
15  
16  
17  
18  
19

20 Interestingly, males were more likely to report tinnitus but females more likely to report  
21 tinnitus being bothersome. One explanation may be that because men are more likely to  
22 have hearing loss,(50) they are more likely to experience tinnitus. But men may be less likely  
23 to report tinnitus as being bothersome due to differences in socialization that leads to men  
24 being less likely to acknowledge and report discomfort in relation to physical symptoms in  
25 general.(51) Higher neuroticism scores were also associated with increased odds of both  
26 tinnitus and bothersome tinnitus, in line with previous research. (52) The lack of association  
27 between neuroticism and increased bothersomeness of tinnitus over time suggests that  
28 neuroticism and psychological discomfort may be a consequence of, rather than a risk for  
29 bothersome tinnitus.  
30  
31  
32  
33  
34  
35  
36  
37  
38  
39

40 Use of ototoxic medication was associated with prevalent tinnitus and bothersome tinnitus,  
41 but not with incidence of tinnitus or changes in bothersomeness. The association between  
42 tinnitus and ototoxic medication is supported by other literature (53) as is the adverse effect  
43 on quality of life that results.(54) Though an association between smoking and tinnitus has  
44 been reported previously,(29, 55) there were no associations with tinnitus in the present  
45 analysis. Both metabolic syndrome and lack of physical activity have previously been  
46 associated with tinnitus (56) and tinnitus bothersomeness,(57, 58) whilst physical activity  
47 was weakly associated with tinnitus in the current study. The relatively low baseline for  
48 being physically active (10 minutes daily moderate activity), and self report measure in the  
49 current study may help to explain this apparent anomaly. Previous studies utilising  
50 accelerometers have indicated that applying higher thresholds for physical activity produced  
51 more pronounced associations in older adult populations.(56)  
52  
53  
54  
55  
56  
57  
58  
59  
60



1  
2  
3  
4  
5 Taken together, there is an indication that generally healthy lifestyle may be linked to  
6 reduced likelihood of tinnitus. Variations in findings relating to both factors across studies  
7 may relate to differences in measurement and the fact that both are also strongly  
8 associated with age, socioeconomic status, and sex. A limitation of the study is that the  
9 sample sizes were substantially lower for the longitudinal analyses; lack of longitudinal  
10 associations may be due to lack of statistical power. The analysis did not include potentially  
11 important explanatory factors (for example, personality factors besides neuroticism, leisure  
12 noise, and genetic factors) and some factors may not have been well captured by the  
13 measures available in this data set. For example, work- and music-related noise exposure  
14 was based on a self-report measure which is estimated to correspond to noise levels above  
15 85 dB(A).(26) But the measure does not account for levels that may substantially exceed 85  
16 dB(A) nor for the use or non-use of ear protection.

17  
18  
19  
20  
21  
22  
23  
24  
25  
26  
27  
28  
29 A key limitation of the present study – and all other tinnitus research - is the lack of a  
30 reliable objective measure of tinnitus, and no agreement about the validity or  
31 characterisation of tinnitus phenotypes.(59) This point was highlighted in the present study:  
32 of those originally reporting tinnitus with subsequent cessation at follow up, over one third  
33 now claimed never to have had tinnitus. This finding calls into question the reliability of the  
34 current self-report measures of tinnitus utilised in epidemiological research and suggests  
35 that a collaborative effort to arrive at a refined definition and appropriate measure of  
36 tinnitus should be made.

37  
38  
39  
40  
41  
42  
43 There were no interactions between prevalent tinnitus, tinnitus bothersomeness or change  
44 in tinnitus bothersomeness with hearing aid use. These data suggest that poor hearing is the  
45 main driver of the risk of tinnitus, but that this is not offset by hearing aid use. Clinical  
46 experience, case series,(60) and retrospective studies(61) indicate that hearing aids can  
47 reduce or inhibit tinnitus, although to date no controlled trials have shown the benefits of  
48 hearing aids on tinnitus.(62) The UK Biobank data did not include information on other  
49 tinnitus therapies, used either individually, or in combination with hearing aids, some of  
50 which have shown promising results. (63) Given the modest and uncertain impact of hearing  
51 aids, public health approaches should focus on primary prevention of hearing loss in order  
52 to reduce the impacts of tinnitus. Additionally, given the largely persistent nature of tinnitus  
53  
54  
55  
56  
57  
58  
59  
60

1  
2  
3 shown in the study, further attention should be paid to effectively managing symptoms in  
4 people with tinnitus, and ultimately to finding a cure.  
5  
6  
7

### 8 **Acknowledgements**

9  
10 This research was conducted using the UK Biobank Resource under Application Number 166.  
11  
12  
13

14  
15 **Competing interests:** None declared  
16

17  
18 **Funding:** PD is supported by the NIHR Manchester Biomedical Research Centre and DB by  
19 the NIHR Nottingham Biomedical Research Centre: however the views expressed are their  
20 own and not necessarily those of the NIHR, the NHS, or the Department of Health and Social  
21 Care. The Open Access publication fee for this paper was paid by the British Tinnitus  
22 Association (grant number: N/A).  
23  
24  
25  
26  
27  
28  
29  
30  
31  
32

### 33 **Author contributions**

34 Piers Dawes; Writing, editing, statistical analysis

35 John Newall; Writing, editing

36 David Stockdale; Writing, editing

37 David M. Baguley; Writing, editing  
38  
39  
40  
41  
42  
43

44 **Data availability statement:** All data utilised in this study are available to medical  
45 researchers on application to the UK Biobank, <https://www.ukbiobank.ac.uk/>  
46  
47  
48  
49  
50  
51  
52  
53  
54  
55  
56  
57  
58  
59  
60

## References

1. Baguley D, McFerran D, Hall D. Tinnitus. *The Lancet*. 2013;382(9904):1600-7.
2. Stockdale D, McFerran D, Brazier P, Pritchard C, Kay T, Dowrick C, et al. An economic evaluation of the healthcare cost of tinnitus management in the UK. *BMC Health Serv Res*. 2017;17(1):577.
3. Andersson G, Vretblad P, Larsen HC, Lyttkens L. Longitudinal follow-up of tinnitus complaints. *Archives of Otolaryngology–Head & Neck Surgery*. 2001;127(2):175-9.
4. Clifford RE, Baker D, Risbrough VB, Huang M, Yurgil KA. Impact of TBI, PTSD, and hearing loss on tinnitus progression in a US Marine cohort. *Mil Med*. 2019;184(11-12):839-46.
5. Stouffer J, Tyler RS, Kileny PR, Dalzell LE. Tinnitus as a function of duration and etiology: counselling implications. *The American journal of otology*. 1991;12(3):188-94.
6. Phillips JS, McFerran DJ, Hall DA, Hoare DJ. The natural history of subjective tinnitus in adults: A systematic review and meta-analysis of no-intervention periods in controlled trials. *The Laryngoscope*. 2018;128(1):217-27.
7. Duckert LG, Rees TS. Placebo effect in tinnitus management. *Otolaryngology—Head and Neck Surgery*. 1984;92(6):697-9.
8. Drew S, Davies E. Effectiveness of Ginkgo biloba in treating tinnitus: double blind, placebo controlled trial. *BMJ*. 2001;322(7278):73.
9. Robinson SK, Viirre ES, Bailey KA, Gerke MA, Harris JP, Stein MB. Randomized placebo-controlled trial of a selective serotonin reuptake inhibitor in the treatment of nondepressed tinnitus subjects. *Psychosom Med*. 2005;67(6):981-8.
10. Smith P, Coles R. Epidemiology of tinnitus: an update. In: Feldmann H, editor. *Proceedings of the third international tinnitus seminar, Karlsruhe: Harsch*. 1987. p. 147-53.
11. Davis A. *Hearing in adults: the prevalence and distribution of hearing impairment and reported hearing disability in the MRC Institute of Hearing Research's National Study of Hearing*: Whurr Publishers London; 1995.
12. Nondahl DM, Cruickshanks KJ, Wiley TL, Klein R, Klein BE, Tweed TS. Prevalence and 5-year incidence of tinnitus among older adults: the epidemiology of hearing loss study. *J Am Acad Audiol*. 2002;13(6):323-31.
13. Gopinath B, McMahon CM, Rochtchina E, Karpa MJ, Mitchell P. Incidence, persistence, and progression of tinnitus symptoms in older adults: the Blue Mountains Hearing Study. *Ear Hear*. 2010;31(3):407-12.
14. Lee HM, Do Han K, Kong SK, Nam EC, Park SN, Shim HJ, et al. Epidemiology of clinically significant tinnitus: a 10-year trend from nationwide health claims data in South Korea. *Otol Neurotol*. 2018;39(6):680-7.
15. Martinez C, Wallenhorst C, McFerran D, Hall DA. Incidence rates of clinically significant tinnitus: 10-year trend from a cohort study in England. *Ear Hear*. 2015;36(3):e69.
16. Nondahl DM, Cruickshanks KJ, Wiley TL, Klein BE, Klein R, Chappell R, et al. The ten-year incidence of tinnitus among older adults. *Int J Audiol*. 2010;49(8):580-5.
17. Collins R. What makes UK Biobank special? *The Lancet*. 2012;9822(379):1173-4.

18. Fry A, Littlejohns TJ, Sudlow C, Doherty N, Adamska L, Sprosen T, et al. Comparison of sociodemographic and health-related characteristics of UK Biobank participants with those of the general population. *Am J Epidemiol.* 2017;186(9):1026-34.
19. Norman P. Identifying change over time in small area socio-economic deprivation. *Applied Spatial Analysis and Policy.* 2010;3(2-3):107-38.
20. Yousaf S, Bonsall A. 2011 UK Townsend Deprivation Scores - Townsend Deprivation Scores Report: UK Data Service; 2017.
21. Davis A, Rafaie EA. Epidemiology of tinnitus. In: Tyler RS, editor. *Tinnitus handbook* Sandiego, CA: Singular; 2000. p. 1-23.
22. Gopinath B, McMahon CM, Rochtchina E, Karpa MJ, Mitchell P. Risk factors and impacts of incident tinnitus in older adults. *Annals of epidemiology.* 2010;20(2):129-35.
23. Davis AC. The prevalence of hearing impairment and reported hearing disability among adults in Great Britain. *International Journal of Epidemiology.* 1989;18(4):911-7.
24. Smits C, Kapteyn TS, Houtgast T. Development and validation of an automatic speech-in-noise screening test by telephone. *Int J Audiol.* 2004;43(1):15-28.
25. Hall J. The development of a new English sentence in noise test and an English number recognition test. Southampton: University of Southampton. 2006.
26. Health and Safety Executive. *Noise at work. Guidance on regulation.* London: HMSO; 1989.
27. National Cholesterol Education Program. Expert Panel on Detection, Evaluation, and treatment of high blood cholesterol in Adults (Adult treatment Panel III). Third report of the National cholesterol Education Program (NCEP) Expert Panel on Detection, Evaluation, and treatment of high blood cholesterol in Adults (Adult treatment Panel III) final report. *Circulation.* 2002;106(25):3143-421.
28. Eysenck SB, Eysenck HJ, Barrett P. A revised version of the psychoticism scale. *Pers Individ Dif.* 1985;6(1):21-9.
29. Shargorodsky J, Curhan GC, Farwell WR. Prevalence and characteristics of tinnitus among US adults. *The American journal of medicine.* 2010;123(8):711-8.
30. McCormack A, Edmondson-Jones M, Fortnum H, Dawes P, Middleton H, Munro KJ, et al. The prevalence of tinnitus and the relationship with neuroticism in a middle-aged UK population. *J Psychosom Res.* 2014;76(1):56-60.
31. IBM Corp. *IBM SPSS Statistics for Windows, Version 23.0.* Armonk, NY IBM Corp.; 2015.
32. McFerran D, Hoare DJ, Carr S, Ray J, Stockdale D. Tinnitus services in the United Kingdom: a survey of patient experiences. *BMC Health Serv Res.* 2018;18(1):110.
33. Kim H-J, Lee H-J, An S-Y, Sim S, Park B, Kim SW, et al. Analysis of the prevalence and associated risk factors of tinnitus in adults. *PLoS One.* 2015;10(5).
34. Nondahl DM, Cruickshanks KJ, Huang G-H, Klein BE, Klein R, Javier Nieto F, et al. Tinnitus and its risk factors in the Beaver Dam offspring study. *Int J Audiol.* 2011;50(5):313-20.
35. Gallus S, Lugo A, Garavello W, Bosetti C, Santoro E, Colombo P, et al. Prevalence and determinants of tinnitus in the Italian adult population. *Neuroepidemiology.* 2015;45(1):12-9.
36. Michikawa T, Nishiwaki Y, Kikuchi Y, Saito H, Mizutari K, Okamoto M, et al. Prevalence and factors associated with tinnitus: a community-based study of Japanese elders. *J Epidemiol.* 2010:271-6.

- 1
- 2
- 3 37. Shore SE, Roberts LE, Langguth B. Maladaptive plasticity in tinnitus—triggers,
- 4 mechanisms and treatment. *Nature Reviews Neurology*. 2016;12(3):150.
- 5
- 6 38. Bhatt JM, Lin HW, Bhattacharyya N. Prevalence, severity, exposures, and treatment
- 7 patterns of tinnitus in the United States. *JAMA Otolaryngology–Head & Neck Surgery*.
- 8 2016;142(10):959-65.
- 9
- 10 39. Axelsson A, Prasher D. Tinnitus induced by occupational and leisure noise. *Noise and*
- 11 *Health*. 2000;2(8):47.
- 12
- 13 40. Liberman MC. Noise-induced and age-related hearing loss: new perspectives and
- 14 potential therapies. *F1000Research*. 2017;6(927).
- 15
- 16 41. Dawes P, Cruickshanks KJ, Moore DR, Edmondson-Jones M, McCormack A, Fortnum
- 17 H, et al. Cigarette smoking, passive smoking, alcohol consumption, and hearing loss. *Journal*
- 18 *of the Association for Research in Otolaryngology*. 2014;15(4):663-74.
- 19
- 20 42. Quaranta A, Assennato G, Sallustio V. Epidemiology of hearing problems among
- 21 adults in Italy. *Scand Audiol Suppl*. 1996;42:9-13.
- 22
- 23 43. Sindhusake D, Golding M, Wigney D, Newall P, Jakobsen K, Mitchell P. Factors
- 24 predicting severity of tinnitus: a population-based assessment. *J Am Acad Audiol*.
- 25 2004;15(4):269-80.
- 26
- 27 44. Sindhusake D, Golding M, Newall P, Rubin G, Jakobsen K, Mitchell P. Risk factors for
- 28 tinnitus in a population of older adults: the blue mountains hearing study. *Ear Hear*.
- 29 2003;24(6):501-7.
- 30
- 31 45. Rimm EB, Giovannucci EL, Willett WC, Colditz GA, Ascherio A, Rosner B, et al.
- 32 Prospective study of alcohol consumption and risk of coronary disease in men. *The Lancet*.
- 33 1991;338(8765):464-8.
- 34
- 35 46. Popelka MM, Cruickshanks KJ, Wiley TL, Tweed TS, Klein BE, Klein R, et al. Moderate
- 36 alcohol consumption and hearing loss: a protective effect. *J Am Geriatr Soc*.
- 37 2000;48(10):1273-8.
- 38
- 39 47. Gopinath B, Flood V, McMahon C, Burlutsky G, Smith W, Mitchell P. The effects of
- 40 smoking and alcohol consumption on age-related hearing loss: the Blue Mountains Hearing
- 41 Study. *Ear Hear*. 2010;31(2):277-82.
- 42
- 43 48. Itoh A, Nakashima T, Arao H, Wakai K, Tamakoshi A, Kawamura T, et al. Smoking and
- 44 drinking habits as risk factors for hearing loss in the elderly: epidemiological study of
- 45 subjects undergoing routine health checks in Aichi, Japan. *Public Health*. 2001;115(3):192-6.
- 46
- 47 49. Hines L, Rimm E. Moderate alcohol consumption and coronary heart disease: a
- 48 review. *Postgrad Med J*. 2001;77(914):747-52.
- 49
- 50 50. Cruickshanks KJ, Wiley TL, Tweed TS, Klein BE, Klein R, Mares-Perlman JA, et al.
- 51 Prevalence of hearing loss in older adults in Beaver Dam, Wisconsin: The epidemiology of
- 52 hearing loss study. *Am J Epidemiol*. 1998;148(9):879-86.
- 53
- 54 51. Barsky AJ, Peekna HM, Borus JF. Somatic symptom reporting in women and men. *J*
- 55 *Gen Intern Med*. 2001;16(4):266-75.
- 56
- 57 52. McKee G, Stephens S. An investigation of normally hearing subjects with tinnitus.
- 58 *Audiology*. 1992;31(6):313-7.
- 59
- 60 53. Dille MF, Konrad-Martin D, Gallun F, Helt WJ, Gordon JS, Reavis KM, et al. Tinnitus
- onset rates from chemotherapeutic agents and ototoxic antibiotics: results of a large
- prospective study. *J Am Acad Audiol*. 2010;21(6):409-17.
- 54
- 55 54. Pearson SE, Taylor J, Patel P, Baguley DM. Cancer survivors treated with platinum-
- 56 based chemotherapy affected by ototoxicity and the impact on quality of life: a narrative
- 57 synthesis systematic review. *Int J Audiol*. 2019;58(11):685-95.

- 1  
2  
3  
4  
5  
6  
7  
8  
9  
10  
11  
12  
13  
14  
15  
16  
17  
18  
19  
20  
21  
22  
23  
24  
25  
26  
27  
28  
29  
30  
31  
32  
33  
34  
35  
36  
37  
38  
39  
40  
41  
42  
43  
44  
45  
46  
47  
48  
49  
50  
51  
52  
53  
54  
55  
56  
57  
58  
59  
60
55. Veile A, Zimmermann H, Lorenz E, Becher H. Is smoking a risk factor for tinnitus? A systematic review, meta-analysis and estimation of the population attributable risk in Germany. *BMJ open*. 2018;8(2):e016589.
56. Loprinzi PD, Lee H, Gilham B, Cardinal BJ. Association between accelerometer-assessed physical activity and tinnitus, NHANES 2005–2006. *Res Q Exerc Sport*. 2013;84(2):177-85.
57. Carpenter-Thompson JR, McAuley E, Husain FT. Physical activity, tinnitus severity, and improved quality of life. *Ear Hear*. 2015;36(5):574-81.
58. Stuerz K, Lafenthaler M, Pfaffenberger N, Kopp M, Gutweniger S, Guenther V. Body image and body concept in patients with chronic tinnitus. *Eur Arch Otorhinolaryngol*. 2009;266(7):961-5.
59. McFerran DJ, Stockdale DJ, Holme R, Large CH, Baguley DM. Why is there no cure for tinnitus? *Front Neurosci*. 2019;13:802.
60. Trotter M, Donaldson I. Hearing aids and tinnitus therapy: a 25-year experience. *The Journal of Laryngology & Otology*. 2008;122(10):1052-6.
61. Searchfield GD, Kaur M, Martin WH. Hearing aids as an adjunct to counseling: Tinnitus patients who choose amplification do better than those that don't. *Int J Audiol*. 2010;49(8):574-9.
62. Hoare DJ, Edmondson-Jones M, Sereda M, Akeroyd MA, Hall D. Amplification with hearing aids for patients with tinnitus and co-existing hearing loss. *Cochrane Database Syst Rev*. 2014(1).
63. Grewal R, Spielmann P, Jones S, Hussain S. Clinical efficacy of tinnitus retraining therapy and cognitive behavioural therapy in the treatment of subjective tinnitus: a systematic review. *The Journal of laryngology and otology*. 2014;128(12):1028.

1  
2  
3  
4  
5  
6  
7  
8  
9  
10  
11  
12  
13  
14  
15  
16  
17  
18  
19  
20  
21  
22  
23  
24  
25  
26  
27  
28  
29  
30  
31  
32  
33  
34  
35  
36  
37  
38  
39  
40  
41  
42  
43  
44  
45  
46  
47  
48  
49  
50  
51  
52  
53  
54  
55  
56  
57  
58  
59  
60

For peer review only
